# Supplementary material
Source: Research Square preprint supplement (doi:10.21203/rs.3.rs-9405252/v1)
Supplement: Supplementary file 1 [file 609ff41b0b99778ebddbb05f.xlsx]

## Sheet: Sheet1
Id	Meta_Id	Rock_Type	Rock_Name	ThinSections	Classes	Olivine_Ratio	Pyroxene_Ratio	Plagioclase_Ratio	Alkali_feldspar_Ratio	Quartz_Ratio	Biotite_Ratio	Muscovite_Ratio	Hornblende_Ratio
1	1	Igneous	Lherzolite-1	Lherzolite-1_1, Lherzolite-1_2, Lherzolite-1_3, Lherzolite-1_4, Lherzolite-1_5, Lherzolite-1_6, Lherzolite-1_7, Lherzolite-1_8	olivine, pyroxene	0.353497	0.192004	0	0	0	0	0	0
2	2	Igneous	Lherzolite-2	Lherzolite-2_1, Lherzolite-2_2, Lherzolite-2_3, Lherzolite-2_4, Lherzolite-2_5, Lherzolite-2_6, Lherzolite-2_7, Lherzolite-2_8	olivine, pyroxene	0.529273	0.120954	0	0	0	0	0	0
3	3	Igneous	Lherzolite-3	Lherzolite-3_1, Lherzolite-3_2, Lherzolite-3_3, Lherzolite-3_4, Lherzolite-3_5, Lherzolite-3_6, Lherzolite-3_7, Lherzolite-3_8	olivine, pyroxene	0.562318	0.086344	0	0	0	0	0	0
4	4	Igneous	Limburgite-1	Limburgite-1_1, Limburgite-1_2, Limburgite-1_3, Limburgite-1_4, Limburgite-1_5, Limburgite-1_6, Limburgite-1_7, Limburgite-1_8	pyroxene	0	0.074007	0	0	0	0	0	0
5	5	Igneous	Limburgite-2	Limburgite-2_1, Limburgite-2_2, Limburgite-2_3, Limburgite-2_4, Limburgite-2_5, Limburgite-2_6, Limburgite-2_7, Limburgite-2_8	olivine, pyroxene	0.02186	0.056281	0	0	0	0	0	0
6	6	Igneous	Limburgite-3	Limburgite-3_1, Limburgite-3_2, Limburgite-3_3, Limburgite-3_4, Limburgite-3_5, Limburgite-3_6, Limburgite-3_7, Limburgite-3_8	olivine, pyroxene	0.007749	0.02693	0	0	0	0	0	0
7	10	Igneous	Norite-Gabbro-1	Norite-Gabbro-1_1, Norite-Gabbro-1_2, Norite-Gabbro-1_3, Norite-Gabbro-1_4, Norite-Gabbro-1_5, Norite-Gabbro-1_6, Norite-Gabbro-1_7, Norite-Gabbro-1_8	pyroxene, plagioclase	0	0.417664	0.173112	0	0	0	0	0
8	11	Igneous	Norite-Gabbro-2	Norite-Gabbro-2_1, Norite-Gabbro-2_2, Norite-Gabbro-2_3, Norite-Gabbro-2_4, Norite-Gabbro-2_5, Norite-Gabbro-2_6, Norite-Gabbro-2_7, Norite-Gabbro-2_8	pyroxene, plagioclase, alkali_feldspar	0	0.328102	0.305327	0.009887	0	0	0	0
9	12	Igneous	Norite-Gabbro-3	Norite-Gabbro-3_1, Norite-Gabbro-3_2, Norite-Gabbro-3_3, Norite-Gabbro-3_4, Norite-Gabbro-3_5, Norite-Gabbro-3_6, Norite-Gabbro-3_7, Norite-Gabbro-3_8	pyroxene, plagioclase, alkali_feldspar	0	0.265562	0.163671	0.269632	0	0	0	0
10	13	Igneous	Diabase-1	Diabase-1_1, Diabase-1_2, Diabase-1_3, Diabase-1_4, Diabase-1_5, Diabase-1_6, Diabase-1_7, Diabase-1_8	pyroxene, plagioclase, alkali_feldspar, biotite	0	0.076981	0.049166	0.112929	0	0.097105	0	0
11	14	Igneous	Diabase-2	Diabase-2_1, Diabase-2_2, Diabase-2_3, Diabase-2_4, Diabase-2_5, Diabase-2_6, Diabase-2_7, Diabase-2_8	pyroxene, alkali_feldspar, biotite	0	0.059732	0	0.429808	0	0.086186	0	0
12	15	Igneous	Diabase-3	Diabase-3_1, Diabase-3_2, Diabase-3_3, Diabase-3_4, Diabase-3_5, Diabase-3_6, Diabase-3_7, Diabase-3_8	pyroxene, plagioclase, alkali_feldspar, biotite	0	0.045851	0.01434	0.031918	0	0.054455	0	0
13	16	Igneous	Anorthosite-1	Anorthosite-1_1, Anorthosite-1_2, Anorthosite-1_3, Anorthosite-1_4, Anorthosite-1_5, Anorthosite-1_6, Anorthosite-1_7, Anorthosite-1_8	pyroxene, plagioclase	0	0.041638	0.618958	0	0	0	0	0
14	17	Igneous	Anorthosite-2	Anorthosite-2_1, Anorthosite-2_2, Anorthosite-2_3, Anorthosite-2_4, Anorthosite-2_5, Anorthosite-2_6, Anorthosite-2_7, Anorthosite-2_8	plagioclase, alkali_feldspar	0	0	0.501412	0.068128	0	0	0	0
15	18	Igneous	Anorthosite-3	Anorthosite-3_1, Anorthosite-3_2, Anorthosite-3_3, Anorthosite-3_4, Anorthosite-3_5, Anorthosite-3_6, Anorthosite-3_7, Anorthosite-3_8	plagioclase, hornblende	0	0	0.67153	0	0	0	0	0.009441
16	19	Igneous	Olivine-Dolerite-1	Olivine-Dolerite-1_1, Olivine-Dolerite-1_2, Olivine-Dolerite-1_3, Olivine-Dolerite-1_4, Olivine-Dolerite-1_5, Olivine-Dolerite-1_6, Olivine-Dolerite-1_7, Olivine-Dolerite-1_8	pyroxene, plagioclase, alkali_feldspar	0	0.091004	0.114571	0.073464	0	0	0	0
17	20	Igneous	Olivine-Dolerite-2	Olivine-Dolerite-2_1, Olivine-Dolerite-2_2, Olivine-Dolerite-2_3, Olivine-Dolerite-2_4, Olivine-Dolerite-2_5, Olivine-Dolerite-2_6, Olivine-Dolerite-2_7, Olivine-Dolerite-2_8	olivine, pyroxene	0.08221	0.100447	0	0	0	0	0	0
18	21	Igneous	Olivine-Dolerite-3	Olivine-Dolerite-3_1, Olivine-Dolerite-3_2, Olivine-Dolerite-3_3, Olivine-Dolerite-3_4, Olivine-Dolerite-3_5, Olivine-Dolerite-3_6, Olivine-Dolerite-3_7, Olivine-Dolerite-3_8	olivine, pyroxene, plagioclase	0.062106	0.097575	0.021569	0	0	0	0	0
19	22	Igneous	Tholeiitic-Basalt-1	Tholeiitic-Basalt-1_1, Tholeiitic-Basalt-1_2, Tholeiitic-Basalt-1_3, Tholeiitic-Basalt-1_4, Tholeiitic-Basalt-1_5, Tholeiitic-Basalt-1_6, Tholeiitic-Basalt-1_7, Tholeiitic-Basalt-1_8	pyroxene, plagioclase, alkali_feldspar	0	0.293416	0.063597	0.05565	0	0	0	0
20	23	Igneous	Tholeiitic-Basalt-2	Tholeiitic-Basalt-2_1, Tholeiitic-Basalt-2_2, Tholeiitic-Basalt-2_3, Tholeiitic-Basalt-2_4, Tholeiitic-Basalt-2_5, Tholeiitic-Basalt-2_6, Tholeiitic-Basalt-2_7, Tholeiitic-Basalt-2_8	pyroxene, plagioclase	0	0.113696	0.124185	0	0	0	0	0
21	24	Igneous	Tholeiitic-Basalt-3	Tholeiitic-Basalt-3_1, Tholeiitic-Basalt-3_2, Tholeiitic-Basalt-3_3, Tholeiitic-Basalt-3_4, Tholeiitic-Basalt-3_5, Tholeiitic-Basalt-3_6, Tholeiitic-Basalt-3_7, Tholeiitic-Basalt-3_8	pyroxene, plagioclase	0	0.164015	0.063802	0	0	0	0	0
22	25	Igneous	Spilite-1	Spilite-1_1, Spilite-1_2, Spilite-1_3, Spilite-1_4, Spilite-1_5, Spilite-1_6, Spilite-1_7, Spilite-1_8	pyroxene, plagioclase, alkali_feldspar	0	0.076648	0.024942	0.48847	0	0	0	0
23	26	Igneous	Spilite-2	Spilite-2_1, Spilite-2_2, Spilite-2_3, Spilite-2_4, Spilite-2_5, Spilite-2_6, Spilite-2_7, Spilite-2_8	pyroxene, plagioclase, alkali_feldspar	0	0.102203	0.030122	0.496786	0	0	0	0
24	27	Igneous	Spilite-3	Spilite-3_1, Spilite-3_2, Spilite-3_3, Spilite-3_4, Spilite-3_5, Spilite-3_6, Spilite-3_7, Spilite-3_8	pyroxene, plagioclase, alkali_feldspar	0	0.062258	0.043616	0.500742	0	0	0	0
25	28	Igneous	Quartz-Diorite-1	Quartz-Diorite-1_1, Quartz-Diorite-1_2, Quartz-Diorite-1_3, Quartz-Diorite-1_4, Quartz-Diorite-1_5, Quartz-Diorite-1_6, Quartz-Diorite-1_7, Quartz-Diorite-1_8	plagioclase, alkali_feldspar, quartz	0	0	0.123904	0.453159	0.074378	0	0	0
26	29	Igneous	Quartz-Diorite-2	Quartz-Diorite-2_1, Quartz-Diorite-2_2, Quartz-Diorite-2_3, Quartz-Diorite-2_4, Quartz-Diorite-2_5, Quartz-Diorite-2_6, Quartz-Diorite-2_7, Quartz-Diorite-2_8	plagioclase, quartz	0	0	0.583064	0	0.064899	0	0	0
27	30	Igneous	Quartz-Diorite-3	Quartz-Diorite-3_1, Quartz-Diorite-3_2, Quartz-Diorite-3_3, Quartz-Diorite-3_4, Quartz-Diorite-3_5, Quartz-Diorite-3_6, Quartz-Diorite-3_7, Quartz-Diorite-3_8	alkali_feldspar, quartz	0	0	0	0.498788	0.036089	0	0	0
28	31	Igneous	Pyroxene-Monzonite-Porphyry-1	Pyroxene-Monzonite-Porphyry-1_1, Pyroxene-Monzonite-Porphyry-1_2, Pyroxene-Monzonite-Porphyry-1_3, Pyroxene-Monzonite-Porphyry-1_4, Pyroxene-Monzonite-Porphyry-1_5, Pyroxene-Monzonite-Porphyry-1_6, Pyroxene-Monzonite-Porphyry-1_7, Pyroxene-Monzonite-Porphyry-1_8	pyroxene, plagioclase, alkali_feldspar	0	0.064608	0.085332	0.544324	0	0	0	0
29	32	Igneous	Pyroxene-Monzonite-Porphyry-2	Pyroxene-Monzonite-Porphyry-2_1, Pyroxene-Monzonite-Porphyry-2_2, Pyroxene-Monzonite-Porphyry-2_3, Pyroxene-Monzonite-Porphyry-2_4, Pyroxene-Monzonite-Porphyry-2_5, Pyroxene-Monzonite-Porphyry-2_6, Pyroxene-Monzonite-Porphyry-2_7, Pyroxene-Monzonite-Porphyry-2_8	pyroxene, plagioclase, alkali_feldspar	0	0.032481	0.326112	0.318271	0	0	0	0
30	33	Igneous	Pyroxene-Monzonite-Porphyry-3	Pyroxene-Monzonite-Porphyry-3_1, Pyroxene-Monzonite-Porphyry-3_2, Pyroxene-Monzonite-Porphyry-3_3, Pyroxene-Monzonite-Porphyry-3_4, Pyroxene-Monzonite-Porphyry-3_5, Pyroxene-Monzonite-Porphyry-3_6, Pyroxene-Monzonite-Porphyry-3_7, Pyroxene-Monzonite-Porphyry-3_8	pyroxene, plagioclase, alkali_feldspar	0	0.045926	0.313445	0.307941	0	0	0	0
31	37	Igneous	Hornblende-Andesite-1	Hornblende-Andesite-1_1, Hornblende-Andesite-1_2, Hornblende-Andesite-1_3, Hornblende-Andesite-1_4, Hornblende-Andesite-1_5, Hornblende-Andesite-1_6, Hornblende-Andesite-1_7, Hornblende-Andesite-1_8	alkali_feldspar, hornblende	0	0	0	0.086211	0	0	0	0.061279
32	38	Igneous	Hornblende-Andesite-2	Hornblende-Andesite-2_1, Hornblende-Andesite-2_2, Hornblende-Andesite-2_3, Hornblende-Andesite-2_4, Hornblende-Andesite-2_5, Hornblende-Andesite-2_6, Hornblende-Andesite-2_7, Hornblende-Andesite-2_8	alkali_feldspar, hornblende	0	0	0	0.081407	0	0	0	0.069759
33	39	Igneous	Hornblende-Andesite-3	Hornblende-Andesite-3_1, Hornblende-Andesite-3_2, Hornblende-Andesite-3_3, Hornblende-Andesite-3_4, Hornblende-Andesite-3_5, Hornblende-Andesite-3_6, Hornblende-Andesite-3_7, Hornblende-Andesite-3_8	pyroxene, alkali_feldspar, hornblende	0	0.005608	0	0.029369	0	0	0	0.101855
34	40	Igneous	Latite-1	Latite-1_1, Latite-1_2, Latite-1_3, Latite-1_4, Latite-1_5, Latite-1_6, Latite-1_7, Latite-1_8	plagioclase, alkali_feldspar, quartz	0	0	0.008185	0.125666	0.023503	0	0	0
35	42	Igneous	Latite-3	Latite-3_1, Latite-3_2, Latite-3_3, Latite-3_4, Latite-3_5, Latite-3_6, Latite-3_7, Latite-3_8	plagioclase, alkali_feldspar, biotite	0	0	0.237189	0.013593	0	0.072751	0	0
36	46	Igneous	Granodiorite-1	Granodiorite-1_1, Granodiorite-1_2, Granodiorite-1_3, Granodiorite-1_4, Granodiorite-1_5, Granodiorite-1_6, Granodiorite-1_7, Granodiorite-1_8	plagioclase, alkali_feldspar, quartz, biotite	0	0	0.07073	0.341713	0.144662	0.029899	0	0
37	47	Igneous	Granodiorite-2	Granodiorite-2_1, Granodiorite-2_2, Granodiorite-2_3, Granodiorite-2_4, Granodiorite-2_5, Granodiorite-2_6, Granodiorite-2_7, Granodiorite-2_8	plagioclase, alkali_feldspar, quartz, biotite	0	0	0.174987	0.101071	0.141269	0.002903	0	0
38	48	Igneous	Granodiorite-3	Granodiorite-3_1, Granodiorite-3_2, Granodiorite-3_3, Granodiorite-3_4, Granodiorite-3_5, Granodiorite-3_6, Granodiorite-3_7, Granodiorite-3_8	plagioclase, alkali_feldspar, quartz, biotite	0	0	0.099197	0.362101	0.149796	0.033031	0	0
39	49	Igneous	Granite-1	Granite-1_1, Granite-1_2, Granite-1_3, Granite-1_4, Granite-1_5, Granite-1_6, Granite-1_7, Granite-1_8	plagioclase, alkali_feldspar, quartz, biotite	0	0	0.125137	0.053487	0.390728	0.014548	0	0
40	50	Igneous	Granite-2	Granite-2_1, Granite-2_2, Granite-2_3, Granite-2_4, Granite-2_5, Granite-2_6, Granite-2_7, Granite-2_8	plagioclase, alkali_feldspar, quartz	0	0	0.026073	0.527048	0.066134	0	0	0
41	51	Igneous	Biotite-Granite-1	Biotite-Granite-1_1, Biotite-Granite-1_2, Biotite-Granite-1_3, Biotite-Granite-1_4, Biotite-Granite-1_5, Biotite-Granite-1_6, Biotite-Granite-1_7, Biotite-Granite-1_8	plagioclase, alkali_feldspar, quartz, biotite	0	0	0.115834	0.435246	0.05149	0.007005	0	0
42	52	Igneous	Granite-Porphyry-1	Granite-Porphyry-1_1, Granite-Porphyry-1_2, Granite-Porphyry-1_3, Granite-Porphyry-1_4, Granite-Porphyry-1_5, Granite-Porphyry-1_6, Granite-Porphyry-1_7, Granite-Porphyry-1_8	plagioclase, alkali_feldspar, quartz, biotite, hornblende	0	0	0.054517	0.248814	0.366299	0.013181	0	0.00222
43	53	Igneous	Granite-Porphyry-2	Granite-Porphyry-2_1, Granite-Porphyry-2_2, Granite-Porphyry-2_3, Granite-Porphyry-2_4, Granite-Porphyry-2_5, Granite-Porphyry-2_6, Granite-Porphyry-2_7, Granite-Porphyry-2_8	plagioclase, alkali_feldspar, quartz, biotite, hornblende	0	0	0.021474	0.119553	0.206223	0.023437	0	0.005692
44	54	Igneous	Granite-Porphyry-3	Granite-Porphyry-3_1, Granite-Porphyry-3_2, Granite-Porphyry-3_3, Granite-Porphyry-3_4, Granite-Porphyry-3_5, Granite-Porphyry-3_6, Granite-Porphyry-3_7, Granite-Porphyry-3_8	plagioclase, alkali_feldspar, quartz, biotite	0	0	0.151926	0.10293	0.153349	0.043375	0	0
45	55	Igneous	Rhyolite-1	Rhyolite-1_1, Rhyolite-1_2, Rhyolite-1_3, Rhyolite-1_4, Rhyolite-1_5, Rhyolite-1_6, Rhyolite-1_7, Rhyolite-1_8	plagioclase, alkali_feldspar, quartz	0	0	0.026807	0.051369	0.004373	0	0	0
46	57	Igneous	Rhyolite-3	Rhyolite-3_1, Rhyolite-3_2, Rhyolite-3_3, Rhyolite-3_4, Rhyolite-3_5, Rhyolite-3_6, Rhyolite-3_7, Rhyolite-3_8	alkali_feldspar, quartz	0	0	0	0.084478	0.008199	0	0	0
47	58	Igneous	Pearlite-1	Pearlite-1_1, Pearlite-1_2, Pearlite-1_3, Pearlite-1_4, Pearlite-1_5, Pearlite-1_6, Pearlite-1_7, Pearlite-1_8	alkali_feldspar, quartz	0	0	0	0.340469	0.003401	0	0	0
48	63	Igneous	Dacite-3	Dacite-3_1, Dacite-3_2, Dacite-3_3, Dacite-3_4, Dacite-3_5, Dacite-3_6, Dacite-3_7, Dacite-3_8	plagioclase, alkali_feldspar, quartz	0	0	0.055683	0.074902	0.076543	0	0	0
49	64	Igneous	Nepheline-Syenite-1	Nepheline-Syenite-1_1, Nepheline-Syenite-1_2, Nepheline-Syenite-1_3, Nepheline-Syenite-1_4, Nepheline-Syenite-1_5, Nepheline-Syenite-1_6, Nepheline-Syenite-1_7, Nepheline-Syenite-1_8	alkali_feldspar	0	0	0	0.397056	0	0	0	0
50	65	Igneous	Nepheline-Syenite-2	Nepheline-Syenite-2_1, Nepheline-Syenite-2_2, Nepheline-Syenite-2_3, Nepheline-Syenite-2_4, Nepheline-Syenite-2_5, Nepheline-Syenite-2_6, Nepheline-Syenite-2_7, Nepheline-Syenite-2_8	alkali_feldspar	0	0	0	0.576559	0	0	0	0
51	66	Igneous	Nepheline-Syenite-3	Nepheline-Syenite-3_1, Nepheline-Syenite-3_2, Nepheline-Syenite-3_3, Nepheline-Syenite-3_4, Nepheline-Syenite-3_5, Nepheline-Syenite-3_6, Nepheline-Syenite-3_7, Nepheline-Syenite-3_8	plagioclase, alkali_feldspar	0	0	0.012586	0.537116	0	0	0	0
52	67	Igneous	Hauyne-Phonolite-1	Hauyne-Phonolite-1_1, Hauyne-Phonolite-1_2, Hauyne-Phonolite-1_3, Hauyne-Phonolite-1_4, Hauyne-Phonolite-1_5, Hauyne-Phonolite-1_6, Hauyne-Phonolite-1_7, Hauyne-Phonolite-1_8	alkali_feldspar	0	0	0	0.299781	0	0	0	0
53	68	Igneous	Hauyne-Phonolite-2	Hauyne-Phonolite-2_1, Hauyne-Phonolite-2_2, Hauyne-Phonolite-2_3, Hauyne-Phonolite-2_4, Hauyne-Phonolite-2_5, Hauyne-Phonolite-2_6, Hauyne-Phonolite-2_7, Hauyne-Phonolite-2_8	pyroxene, alkali_feldspar	0	0.004253	0	0.174015	0	0	0	0
54	69	Igneous	Hauyne-Phonolite-3	Hauyne-Phonolite-3_1, Hauyne-Phonolite-3_2, Hauyne-Phonolite-3_3, Hauyne-Phonolite-3_4, Hauyne-Phonolite-3_5, Hauyne-Phonolite-3_6, Hauyne-Phonolite-3_7, Hauyne-Phonolite-3_8	alkali_feldspar	0	0	0	0.138148	0	0	0	0
55	73	Igneous	Spessartite-1	Spessartite-1_1, Spessartite-1_2, Spessartite-1_3, Spessartite-1_4, Spessartite-1_5, Spessartite-1_6, Spessartite-1_7, Spessartite-1_8	plagioclase, alkali_feldspar, hornblende	0	0	0.006691	0.084969	0	0	0	0.29992
56	74	Igneous	Spessartite-2	Spessartite-2_1, Spessartite-2_2, Spessartite-2_3, Spessartite-2_4, Spessartite-2_5, Spessartite-2_6, Spessartite-2_7, Spessartite-2_8	plagioclase, alkali_feldspar, hornblende	0	0	0.042468	0.372735	0	0	0	0.245705
57	75	Igneous	Spessartite-3	Spessartite-3_1, Spessartite-3_2, Spessartite-3_3, Spessartite-3_4, Spessartite-3_5, Spessartite-3_6, Spessartite-3_7, Spessartite-3_8	hornblende	0	0	0	0	0	0	0	0.333119
58	76	Igneous	Muscovite-Granite-1	Muscovite-Granite-1_1, Muscovite-Granite-1_2, Muscovite-Granite-1_3, Muscovite-Granite-1_4, Muscovite-Granite-1_5, Muscovite-Granite-1_6, Muscovite-Granite-1_7, Muscovite-Granite-1_8	plagioclase, alkali_feldspar, quartz, muscovite	0	0	0.06668	0.284957	0.06474	0	0.119181	0
59	77	Igneous	Muscovite-Granite-2	Muscovite-Granite-2_1, Muscovite-Granite-2_2, Muscovite-Granite-2_3, Muscovite-Granite-2_4, Muscovite-Granite-2_5, Muscovite-Granite-2_6, Muscovite-Granite-2_7, Muscovite-Granite-2_8	plagioclase, alkali_feldspar, quartz, muscovite	0	0	0.314368	0.156062	0.160939	0	0.035972	0
60	78	Igneous	Muscovite-Granite-3	Muscovite-Granite-3_1, Muscovite-Granite-3_2, Muscovite-Granite-3_3, Muscovite-Granite-3_4, Muscovite-Granite-3_5, Muscovite-Granite-3_6, Muscovite-Granite-3_7, Muscovite-Granite-3_8	plagioclase, alkali_feldspar, quartz, muscovite	0	0	0.168813	0.280675	0.146999	0	0.09193	0
61	79	Igneous	Pegmatite-1	Pegmatite-1_1, Pegmatite-1_2, Pegmatite-1_3, Pegmatite-1_4, Pegmatite-1_5, Pegmatite-1_6, Pegmatite-1_7, Pegmatite-1_8	alkali_feldspar, quartz	0	0	0	0.376025	0.217773	0	0	0
62	80	Igneous	Pegmatite-2	Pegmatite-2_1, Pegmatite-2_2, Pegmatite-2_3, Pegmatite-2_4, Pegmatite-2_5, Pegmatite-2_6, Pegmatite-2_7, Pegmatite-2_8	alkali_feldspar, quartz	0	0	0	0.50427	0.196801	0	0	0
63	81	Igneous	Pegmatite-3	Pegmatite-3_1, Pegmatite-3_2, Pegmatite-3_3, Pegmatite-3_4, Pegmatite-3_5, Pegmatite-3_6, Pegmatite-3_7, Pegmatite-3_8	alkali_feldspar, quartz	0	0	0	0.501321	0.200059	0	0	0
64	82	Igneous	Dunite-1	Dunite-1_1, Dunite-1_2, Dunite-1_3, Dunite-1_4, Dunite-1_5, Dunite-1_6, Dunite-1_7, Dunite-1_8	olivine	0.664454	0	0	0	0	0	0	0
65	83	Igneous	Dunite-2	Dunite-2_1, Dunite-2_2, Dunite-2_3, Dunite-2_4, Dunite-2_5, Dunite-2_6, Dunite-2_7, Dunite-2_8	olivine	0.68475	0	0	0	0	0	0	0
66	84	Igneous	Dunite-3	Dunite-3_1, Dunite-3_2, Dunite-3_3, Dunite-3_4, Dunite-3_5, Dunite-3_6, Dunite-3_7, Dunite-3_8	olivine	0.66674	0	0	0	0	0	0	0
67	85	Igneous	Pyroxene-Peridotite-1	Pyroxene-Peridotite-1_1, Pyroxene-Peridotite-1_2, Pyroxene-Peridotite-1_3, Pyroxene-Peridotite-1_4, Pyroxene-Peridotite-1_5, Pyroxene-Peridotite-1_6, Pyroxene-Peridotite-1_7, Pyroxene-Peridotite-1_8	olivine, pyroxene	0.256376	0.261622	0	0	0	0	0	0
68	86	Igneous	Pyroxene-Peridotite-2	Pyroxene-Peridotite-2_1, Pyroxene-Peridotite-2_2, Pyroxene-Peridotite-2_3, Pyroxene-Peridotite-2_4, Pyroxene-Peridotite-2_5, Pyroxene-Peridotite-2_6, Pyroxene-Peridotite-2_7, Pyroxene-Peridotite-2_8	olivine, pyroxene	0.266553	0.236213	0	0	0	0	0	0
69	87	Igneous	Pyroxene-Peridotite-3	Pyroxene-Peridotite-3_1, Pyroxene-Peridotite-3_2, Pyroxene-Peridotite-3_3, Pyroxene-Peridotite-3_4, Pyroxene-Peridotite-3_5, Pyroxene-Peridotite-3_6, Pyroxene-Peridotite-3_7, Pyroxene-Peridotite-3_8	olivine, pyroxene	0.152872	0.176904	0	0	0	0	0	0
70	88	Igneous	Titanaugite-1	Titanaugite-1_1, Titanaugite-1_2, Titanaugite-1_3, Titanaugite-1_4, Titanaugite-1_5, Titanaugite-1_6, Titanaugite-1_7, Titanaugite-1_8	pyroxene	0	0.631934	0	0	0	0	0	0
71	89	Igneous	Titanaugite-2	Titanaugite-2_1, Titanaugite-2_2, Titanaugite-2_3, Titanaugite-2_4, Titanaugite-2_5, Titanaugite-2_6, Titanaugite-2_7, Titanaugite-2_8	pyroxene	0	0.450431	0	0	0	0	0	0
72	90	Igneous	Titanaugite-3	Titanaugite-3_1, Titanaugite-3_2, Titanaugite-3_3, Titanaugite-3_4, Titanaugite-3_5, Titanaugite-3_6, Titanaugite-3_7, Titanaugite-3_8	pyroxene	0	0.512761	0	0	0	0	0	0
73	91	Igneous	Diabase-4	Diabase-4_1, Diabase-4_2, Diabase-4_3, Diabase-4_4, Diabase-4_5, Diabase-4_6, Diabase-4_7, Diabase-4_8	pyroxene, alkali_feldspar	0	0.114764	0	0.483401	0	0	0	0
74	92	Igneous	Diabase-5	Diabase-5_1, Diabase-5_2, Diabase-5_3, Diabase-5_4, Diabase-5_5, Diabase-5_6, Diabase-5_7, Diabase-5_8	pyroxene, plagioclase, alkali_feldspar	0	0.202601	0.337122	0.081116	0	0	0	0
75	93	Igneous	Diabase-6	Diabase-6_1, Diabase-6_2, Diabase-6_3, Diabase-6_4, Diabase-6_5, Diabase-6_6, Diabase-6_7, Diabase-6_8	pyroxene, plagioclase, alkali_feldspar	0	0.108653	0.177197	0.142648	0	0	0	0
76	100	Igneous	Syenite-1	Syenite-1_1, Syenite-1_2, Syenite-1_3, Syenite-1_4, Syenite-1_5, Syenite-1_6, Syenite-1_7, Syenite-1_8	alkali_feldspar, biotite	0	0	0	0.622324	0	0.029528	0	0
77	101	Igneous	Syenite-2	Syenite-2_1, Syenite-2_2, Syenite-2_3, Syenite-2_4, Syenite-2_5, Syenite-2_6, Syenite-2_7, Syenite-2_8	alkali_feldspar, biotite	0	0	0	0.248395	0	0.069482	0	0
78	102	Igneous	Syenite-3	Syenite-3_1, Syenite-3_2, Syenite-3_3, Syenite-3_4, Syenite-3_5, Syenite-3_6, Syenite-3_7, Syenite-3_8	alkali_feldspar, biotite	0	0	0	0.623011	0	0.048423	0	0
79	112	Igneous	Minette-1	Minette-1_1, Minette-1_2, Minette-1_3, Minette-1_4, Minette-1_5, Minette-1_6, Minette-1_7, Minette-1_8	biotite	0	0	0	0	0	0.164734	0	0
80	114	Igneous	Minette-3	Minette-3_1, Minette-3_2, Minette-3_3, Minette-3_4, Minette-3_5, Minette-3_6, Minette-3_7, Minette-3_8	biotite	0	0	0	0	0	0.251801	0	0
81	115	Igneous	Charnockite-1	Charnockite-1_1, Charnockite-1_2, Charnockite-1_3, Charnockite-1_4, Charnockite-1_5, Charnockite-1_6, Charnockite-1_7, Charnockite-1_8	pyroxene, plagioclase, quartz	0	0.071973	0.415663	0	0.204709	0	0	0
82	116	Igneous	Charnockite-2	Charnockite-2_1, Charnockite-2_2, Charnockite-2_3, Charnockite-2_4, Charnockite-2_5, Charnockite-2_6, Charnockite-2_7, Charnockite-2_8	pyroxene, plagioclase, alkali_feldspar, quartz	0	0.130788	0.162218	0.165967	0.192547	0	0	0
83	117	Igneous	Charnockite-3	Charnockite-3_1, Charnockite-3_2, Charnockite-3_3, Charnockite-3_4, Charnockite-3_5, Charnockite-3_6, Charnockite-3_7, Charnockite-3_8	pyroxene, plagioclase, alkali_feldspar, quartz	0	0.054458	0.111452	0.354927	0.150309	0	0	0
84	22	Metamorphic	Greisen-1	Greisen-1_1, Greisen-1_2, Greisen-1_3, Greisen-1_4, Greisen-1_5, Greisen-1_6, Greisen-1_7, Greisen-1_8	quartz, muscovite	0	0	0	0	0.487962	0	0.196325	0
85	23	Metamorphic	Greisen-2	Greisen-2_1, Greisen-2_2, Greisen-2_3, Greisen-2_4, Greisen-2_5, Greisen-2_6, Greisen-2_7, Greisen-2_8	quartz, muscovite	0	0	0	0	0.392638	0	0.302444	0
86	24	Metamorphic	Greisen-3	Greisen-3_1, Greisen-3_2, Greisen-3_3, Greisen-3_4, Greisen-3_5, Greisen-3_6, Greisen-3_7, Greisen-3_8	quartz, muscovite	0	0	0	0	0.331334	0	0.371698	0
87	32	Metamorphic	Muscovite-Schist-2	Muscovite-Schist-2_1, Muscovite-Schist-2_2, Muscovite-Schist-2_3, Muscovite-Schist-2_4, Muscovite-Schist-2_5, Muscovite-Schist-2_6, Muscovite-Schist-2_7, Muscovite-Schist-2_8	quartz, muscovite	0	0	0	0	0.384886	0	0.314726	0
88	33	Metamorphic	Muscovite-Schist-3	Muscovite-Schist-3_1, Muscovite-Schist-3_2, Muscovite-Schist-3_3, Muscovite-Schist-3_4, Muscovite-Schist-3_5, Muscovite-Schist-3_6, Muscovite-Schist-3_7, Muscovite-Schist-3_8	quartz, muscovite	0	0	0	0	0.454214	0	0.24399	0
89	49	Metamorphic	Plagioclase-Amphibolite-1	Plagioclase-Amphibolite-1_1, Plagioclase-Amphibolite-1_2, Plagioclase-Amphibolite-1_3, Plagioclase-Amphibolite-1_4, Plagioclase-Amphibolite-1_5, Plagioclase-Amphibolite-1_6, Plagioclase-Amphibolite-1_7, Plagioclase-Amphibolite-1_8	plagioclase, alkali_feldspar, hornblende	0	0	0.00260849	0.171085	0	0	0	0.508517
90	50	Metamorphic	Plagioclase-Amphibolite-2	Plagioclase-Amphibolite-2_1, Plagioclase-Amphibolite-2_2, Plagioclase-Amphibolite-2_3, Plagioclase-Amphibolite-2_4, Plagioclase-Amphibolite-2_5, Plagioclase-Amphibolite-2_6, Plagioclase-Amphibolite-2_7, Plagioclase-Amphibolite-2_8	plagioclase, alkali_feldspar, hornblende	0	0	0.00849762	0.14854	0	0	0	0.535786
91	51	Metamorphic	Plagioclase-Amphibolite-3	Plagioclase-Amphibolite-3_1, Plagioclase-Amphibolite-3_2, Plagioclase-Amphibolite-3_3, Plagioclase-Amphibolite-3_4, Plagioclase-Amphibolite-3_5, Plagioclase-Amphibolite-3_6, Plagioclase-Amphibolite-3_7, Plagioclase-Amphibolite-3_8	plagioclase, alkali_feldspar, hornblende	0	0	0.0230011	0.140841	0	0	0	0.52361
92	52	Metamorphic	Granulite-4	Granulite-4_1, Granulite-4_2, Granulite-4_3, Granulite-4_4, Granulite-4_5, Granulite-4_6, Granulite-4_7, Granulite-4_8	pyroxene, plagioclase, alkali_feldspar	0	0.415435	0.0146561	0.256877	0	0	0	0
93	53	Metamorphic	Granulite-5	Granulite-5_1, Granulite-5_2, Granulite-5_3, Granulite-5_4, Granulite-5_5, Granulite-5_6, Granulite-5_7, Granulite-5_8	pyroxene, plagioclase, alkali_feldspar	0	0.39419	0.0457596	0.227439	0	0	0	0
94	54	Metamorphic	Granulite-6	Granulite-6_1, Granulite-6_2, Granulite-6_3, Granulite-6_4, Granulite-6_5, Granulite-6_6, Granulite-6_7, Granulite-6_8	pyroxene, plagioclase, alkali_feldspar	0	0.368346	0.028862	0.287298	0	0	0	0
95	112	Metamorphic	Amphibolite-Schist-1	Amphibolite-Schist-1_1, Amphibolite-Schist-1_2, Amphibolite-Schist-1_3, Amphibolite-Schist-1_4, Amphibolite-Schist-1_5, Amphibolite-Schist-1_6, Amphibolite-Schist-1_7, Amphibolite-Schist-1_8	alkali_feldspar, quartz, hornblende	0	0	0	0.134898	0.00776596	0	0	0.404163
96	113	Metamorphic	Amphibolite-Schist-2	Amphibolite-Schist-2_1, Amphibolite-Schist-2_2, Amphibolite-Schist-2_3, Amphibolite-Schist-2_4, Amphibolite-Schist-2_5, Amphibolite-Schist-2_6, Amphibolite-Schist-2_7, Amphibolite-Schist-2_8	alkali_feldspar, quartz, hornblende	0	0	0	0.234245	0.0151817	0	0	0.330313
97	114	Metamorphic	Amphibolite-Schist-3	Amphibolite-Schist-3_1, Amphibolite-Schist-3_2, Amphibolite-Schist-3_3, Amphibolite-Schist-3_4, Amphibolite-Schist-3_5, Amphibolite-Schist-3_6, Amphibolite-Schist-3_7, Amphibolite-Schist-3_8	alkali_feldspar, quartz, hornblende	0	0	0	0.203963	0.0368614	0	0	0.386438
