# Supplementary material
Source: Research Square preprint supplement (doi:10.21203/rs.3.rs-9405252/v1)
Supplement: Supplementary file 2 [file 610584a4e236015968ce5e52.xlsx]

## Sheet: Sheet1
Model	Input Resolution	Encoder Params	Decoder Params	Total Params	Pretrained Weight
ViT-Small(DINOv3)+SSM	All	21.59 M	2.85 M	24.44 M	https://www.modelscope.cn/models/facebook/dinov3-vits16-pretrain-lvd1689m
ViT-Small(Sup)+SSM	224	21.67 M	2.85 M	24.52 M	https://www.modelscope.cn/models/timm/vit_small_patch16_224.augreg_in21k
ViT-Base(DINOv3)+SSM	All	85.65 M	4.43 M	90.08 M	https://www.modelscope.cn/models/facebook/dinov3-vitb16-pretrain-lvd1689m
ViT-Large(DINOv3)+SSM	All	303.10 M	6.4 M	309.50 M	https://www.modelscope.cn/models/facebook/dinov3-vitl16-pretrain-lvd1689m
ConvNeXt-Tiny(DINOv3)+UPerNet	All	27.82 M	4.11 M	31.93 M	https://www.modelscope.cn/models/facebook/dinov3-convnext-tiny-pretrain-lvd1689m
ConvNeXt-Tiny(Sup)+UPerNet	224	27.82 M	4.11 M	31.93 M	https://dl.fbaipublicfiles.com/convnext/convnext_tiny_22k_1k_224.pth
ConvNeXt-Small(DINOv3)+UPerNet	All	49.45 M	4.12 M	53.57 M	https://www.modelscope.cn/models/facebook/dinov3-convnext-small-pretrain-lvd1689m
ConvNeXt-Base(DINOv3)+UPerNet	All	87.57 M	5.82 M	93.39 M	https://www.modelscope.cn/models/facebook/dinov3-convnext-base-pretrain-lvd1689m
