# Supplementary material
Source: Research Square preprint supplement (doi:10.21203/rs.3.rs-9405252/v1)
Supplement: Supplementary file 3 [file 68775a17c6d92d7568837add.xlsx]

## Sheet: Sheet1
Backbone	Pretraining	Strategy	Resolution	Olivine	Pyroxene	Plagioclase	Alkali Feldspar	Quartz	Biotite	Muscovite	Hornblende	All Minerals
ConvNeXt-Base	DINOv3	GN+RCR	224	0.9817	0.4083	0.4114	0.5849	0.6272	0.2732	0.5926	0.6812	0.5701
ConvNeXt-Base	DINOv3	GN+RCR	384	0.9474	0.4933	0.3559	0.6671	0.7479	0.4432	0.7431	0.757	0.6444
ConvNeXt-Base	DINOv3	GN+RCR	768	0.9824	0.6688	0.3925	0.7104	0.7763	0.5434	0.7795	0.8139	0.7084
ConvNeXt-Base	DINOv3	GN+RCR+RB	224	0.9803	0.2691	0.3686	0.5828	0.5906	0.3201	0.6134	0.6818	0.5508
ConvNeXt-Base	DINOv3	GN+RCR+RB	384	0.9983	0.5263	0.4109	0.6345	0.6968	0.4234	0.7049	0.7165	0.6389
ConvNeXt-Base	DINOv3	GN+RCR+RB	768	0.9736	0.5996	0.3525	0.6952	0.783	0.4387	0.797	0.8058	0.6807
ConvNeXt-Base	DINOv3	GN+RCR+RB+LIB	224	0.955	0.4597	0.2572	0.6179	0.6414	0.4173	0.6415	0.7152	0.5882
ConvNeXt-Base	DINOv3	GN+RCR+RB+LIB	384	0.9632	0.5114	0.2281	0.667	0.7722	0.4751	0.7777	0.7991	0.6492
ConvNeXt-Base	DINOv3	GN+RCR+RB+LIB	768	0.9665	0.5856	0.3386	0.7134	0.8241	0.5075	0.8331	0.828	0.6996
ConvNeXt-Base	Sup	GN+RCR	224	0.8902	0.3214	0.3253	0.6133	0.6531	0.2884	0.6512	0.7065	0.5562
ConvNeXt-Base	Sup	GN+RCR	384	0.9984	0.5556	0.3081	0.639	0.7006	0.359	0.7244	0.7493	0.6293
ConvNeXt-Base	Sup	GN+RCR	768	0.9408	0.4556	0.3778	0.6771	0.7512	0.4311	0.7808	0.8042	0.6523
ConvNeXt-Base	Sup	GN+RCR+RB	224	0.9533	0.3351	0.2551	0.5966	0.5834	0.2258	0.6181	0.7066	0.5343
ConvNeXt-Base	Sup	GN+RCR+RB	384	0.9427	0.4361	0.2849	0.6375	0.6613	0.3541	0.6657	0.7274	0.5887
ConvNeXt-Base	Sup	GN+RCR+RB	768	0.8464	0.2695	0.4054	0.6647	0.7098	0.3775	0.7081	0.7367	0.5898
ConvNeXt-Base	Sup	GN+RCR+RB+LIB	224	0.8241	0.2088	0.1849	0.6067	0.6682	0.3162	0.6715	0.7266	0.5259
ConvNeXt-Base	Sup	GN+RCR+RB+LIB	384	0.7622	0.3417	0.2859	0.6315	0.7222	0.3616	0.7589	0.7782	0.5803
ConvNeXt-Base	Sup	GN+RCR+RB+LIB	768	0.8993	0.4388	0.3895	0.6945	0.7907	0.3633	0.8061	0.8047	0.6484
ConvNeXt-Large	DINOv3	GN+RCR	224	0.7654	0.3381	0.3816	0.6786	0.7328	0.2093	0.7054	0.7863	0.5747
ConvNeXt-Large	DINOv3	GN+RCR	384	0.953	0.4772	0.3183	0.6468	0.7213	0.4689	0.7373	0.7572	0.635
ConvNeXt-Large	DINOv3	GN+RCR	768	0.9194	0.5238	0.3875	0.7234	0.8079	0.5075	0.8234	0.8217	0.6893
ConvNeXt-Large	DINOv3	GN+RCR+RB	224	0.9309	0.4359	0.2454	0.6808	0.7557	0.257	0.7557	0.799	0.6076
ConvNeXt-Large	DINOv3	GN+RCR+RB	384	0.9957	0.5971	0.2111	0.6626	0.7503	0.5202	0.7319	0.7737	0.6553
ConvNeXt-Large	DINOv3	GN+RCR+RB	768	0.9472	0.5886	0.3566	0.7046	0.7827	0.5816	0.7897	0.7986	0.6937
ConvNeXt-Large	DINOv3	GN+RCR+RB+LIB	224	0.7663	0.3199	0.3385	0.6792	0.7776	0.3995	0.8085	0.8121	0.6127
ConvNeXt-Large	DINOv3	GN+RCR+RB+LIB	384	0.9629	0.5486	0.4082	0.6594	0.7493	0.4752	0.7518	0.7527	0.6635
ConvNeXt-Large	DINOv3	GN+RCR+RB+LIB	768	0.8986	0.5205	0.4117	0.7265	0.8239	0.5802	0.8349	0.8262	0.7028
ConvNeXt-Large	Sup	GN+RCR	224	0.9565	0.419	0.2901	0.6287	0.6649	0.3279	0.6428	0.7329	0.5829
ConvNeXt-Large	Sup	GN+RCR	384	0.8115	0.3635	0.372	0.667	0.6707	0.4593	0.7182	0.7753	0.6047
ConvNeXt-Large	Sup	GN+RCR	768	0.9906	0.5655	0.432	0.6973	0.7495	0.4581	0.7681	0.795	0.682
ConvNeXt-Large	Sup	GN+RCR+RB	224	0.9144	0.3735	0.4126	0.6133	0.6398	0.2926	0.6183	0.6921	0.5696
ConvNeXt-Large	Sup	GN+RCR+RB	384	0.8153	0.3061	0.3926	0.6393	0.6734	0.3215	0.6576	0.7292	0.5669
ConvNeXt-Large	Sup	GN+RCR+RB	768	0.662	0.2879	0.3918	0.7038	0.7671	0.5193	0.7979	0.8117	0.6177
ConvNeXt-Large	Sup	GN+RCR+RB+LIB	224	0.9794	0.4464	0.3172	0.6192	0.5895	0.2565	0.5954	0.6734	0.5596
ConvNeXt-Large	Sup	GN+RCR+RB+LIB	384	0.9219	0.4301	0.4097	0.6538	0.7254	0.356	0.7391	0.7452	0.6227
ConvNeXt-Large	Sup	GN+RCR+RB+LIB	768	0.6514	0.2962	0.3391	0.7115	0.7823	0.5318	0.7853	0.83	0.616
ConvNeXt-Small	DINOv3	GN+RCR	224	0.9829	0.3968	0.4264	0.5606	0.6038	0.253	0.5358	0.6673	0.5533
ConvNeXt-Small	DINOv3	GN+RCR	384	0.9671	0.4628	0.3934	0.6451	0.6967	0.4054	0.6681	0.6884	0.6159
ConvNeXt-Small	DINOv3	GN+RCR	768	0.9655	0.6027	0.3826	0.6852	0.7922	0.4551	0.7686	0.8133	0.6831
ConvNeXt-Small	DINOv3	GN+RCR+RB	224	0.9998	0.4296	0.3574	0.5754	0.6105	0.1096	0.5084	0.6841	0.5344
ConvNeXt-Small	DINOv3	GN+RCR+RB	384	0.9973	0.4884	0.444	0.6487	0.6612	0.3875	0.65	0.6963	0.6217
ConvNeXt-Small	DINOv3	GN+RCR+RB	768	0.9723	0.5201	0.3569	0.6825	0.7885	0.5242	0.794	0.786	0.6781
ConvNeXt-Small	DINOv3	GN+RCR+RB+LIB	224	0.9539	0.2255	0.2723	0.5848	0.6372	0.2902	0.6164	0.7167	0.5371
ConvNeXt-Small	DINOv3	GN+RCR+RB+LIB	384	0.966	0.5282	0.2733	0.6336	0.7116	0.3146	0.7386	0.7579	0.6155
ConvNeXt-Small	DINOv3	GN+RCR+RB+LIB	768	0.9739	0.5248	0.3316	0.6993	0.7624	0.4485	0.789	0.8179	0.6684
ConvNeXt-Small	Sup	GN+RCR	224	0.9135	0.2938	0.3191	0.6281	0.6747	0.3317	0.6681	0.7301	0.5699
ConvNeXt-Small	Sup	GN+RCR	384	0.9046	0.3752	0.2493	0.6703	0.7528	0.2998	0.7616	0.7856	0.5999
ConvNeXt-Small	Sup	GN+RCR	768	0.8411	0.3867	0.4701	0.6631	0.725	0.361	0.7338	0.7179	0.6123
ConvNeXt-Small	Sup	GN+RCR+RB	224	0.9905	0.2546	0.2563	0.5849	0.5646	0.1417	0.4762	0.6592	0.491
ConvNeXt-Small	Sup	GN+RCR+RB	384	0.9052	0.3778	0.3082	0.6459	0.6821	0.1801	0.6992	0.7215	0.565
ConvNeXt-Small	Sup	GN+RCR+RB	768	0.9648	0.421	0.3587	0.6703	0.7496	0.2189	0.7786	0.7595	0.6152
ConvNeXt-Small	Sup	GN+RCR+RB+LIB	224	0.9503	0.2897	0.1398	0.6185	0.6745	0.1667	0.5939	0.7229	0.5195
ConvNeXt-Small	Sup	GN+RCR+RB+LIB	384	0.9642	0.4293	0.2872	0.6616	0.7308	0.4481	0.7816	0.7888	0.6364
ConvNeXt-Small	Sup	GN+RCR+RB+LIB	768	0.8943	0.5116	0.3449	0.6801	0.7884	0.293	0.8218	0.7781	0.639
ConvNeXt-Tiny	DINOv3	GN+RCR	224	0.9805	0.3799	0.3199	0.5692	0.6038	0.2632	0.591	0.6981	0.5507
ConvNeXt-Tiny	DINOv3	GN+RCR	384	0.9943	0.5058	0.2564	0.6254	0.703	0.2826	0.7275	0.7167	0.6015
ConvNeXt-Tiny	DINOv3	GN+RCR	768	0.9619	0.5196	0.2914	0.6641	0.7578	0.4319	0.757	0.7782	0.6452
ConvNeXt-Tiny	DINOv3	GN+RCR+RB	224	0.9664	0.3895	0.4306	0.5715	0.5909	0.1503	0.5812	0.6805	0.5451
ConvNeXt-Tiny	DINOv3	GN+RCR+RB	384	0.992	0.3465	0.2728	0.6242	0.6962	0.3764	0.6872	0.7115	0.5883
ConvNeXt-Tiny	DINOv3	GN+RCR+RB	768	0.9439	0.5553	0.337	0.6722	0.7599	0.5532	0.8004	0.8034	0.6782
ConvNeXt-Tiny	DINOv3	GN+RCR+RB+LIB	224	0.983	0.4221	0.2965	0.6069	0.6569	0.2319	0.6486	0.712	0.5698
ConvNeXt-Tiny	DINOv3	GN+RCR+RB+LIB	384	0.9323	0.4577	0.2319	0.6299	0.7187	0.4351	0.7147	0.7258	0.6058
ConvNeXt-Tiny	DINOv3	GN+RCR+RB+LIB	768	0.9369	0.5199	0.3372	0.6982	0.7754	0.3692	0.7915	0.8208	0.6561
ConvNeXt-Tiny	Sup	GN+RCR	224	0.9365	0.3716	0.2597	0.6282	0.6846	0.2792	0.605	0.7136	0.5598
ConvNeXt-Tiny	Sup	GN+RCR	384	0.9036	0.3475	0.4128	0.6453	0.7028	0.4446	0.7238	0.7461	0.6158
ConvNeXt-Tiny	Sup	GN+RCR	768	0.8947	0.4615	0.3432	0.6922	0.7707	0.4032	0.7825	0.817	0.6456
ConvNeXt-Tiny	Sup	GN+RCR+RB	224	0.9638	0.3483	0.2556	0.6004	0.6757	0.1513	0.6652	0.7121	0.5466
ConvNeXt-Tiny	Sup	GN+RCR+RB	384	0.6747	0.1934	0.2869	0.6351	0.6987	0.3057	0.7028	0.729	0.5283
ConvNeXt-Tiny	Sup	GN+RCR+RB	768	0.7703	0.2516	0.4079	0.6795	0.7344	0.426	0.7521	0.7727	0.5993
ConvNeXt-Tiny	Sup	GN+RCR+RB+LIB	224	0.9568	0.4088	0.2333	0.5964	0.6679	0.392	0.6466	0.7236	0.5782
ConvNeXt-Tiny	Sup	GN+RCR+RB+LIB	384	0.8954	0.3378	0.3539	0.6458	0.7047	0.384	0.7152	0.7315	0.596
ConvNeXt-Tiny	Sup	GN+RCR+RB+LIB	768	0.9009	0.4654	0.273	0.6878	0.7721	0.4428	0.7978	0.8219	0.6452
ViT-Base	DINOv3	GN+RCR	224	0.9943	0.3938	0.3195	0.6135	0.6304	0.1598	0.5359	0.6887	0.542
ViT-Base	DINOv3	GN+RCR	384	0.9921	0.4948	0.2834	0.6501	0.7237	0.4804	0.7017	0.7332	0.6324
ViT-Base	DINOv3	GN+RCR	768	0.9905	0.6619	0.4492	0.7177	0.8199	0.6054	0.8102	0.7866	0.7302
ViT-Base	DINOv3	GN+RCR+RB	224	0.9949	0.3827	0.382	0.6006	0.5823	0.2246	0.5554	0.6566	0.5474
ViT-Base	DINOv3	GN+RCR+RB	384	0.9957	0.5196	0.4591	0.6306	0.6819	0.3721	0.6443	0.7274	0.6288
ViT-Base	DINOv3	GN+RCR+RB	768	0.9985	0.6942	0.4106	0.716	0.8135	0.5909	0.813	0.8152	0.7315
ViT-Base	DINOv3	GN+RCR+RB+LIB	224	0.9474	0.3374	0.3355	0.5913	0.6357	0.2576	0.5586	0.6882	0.544
ViT-Base	DINOv3	GN+RCR+RB+LIB	384	0.9622	0.5075	0.3613	0.6549	0.7188	0.4614	0.6814	0.7349	0.6353
ViT-Base	DINOv3	GN+RCR+RB+LIB	768	0.9988	0.6617	0.425	0.7138	0.818	0.6351	0.8173	0.8039	0.7342
ViT-Base	Sup	GN+RCR	224	0.9289	0.0175	0.1806	0.5239	0.5528	0.1603	0.2244	0.6607	0.4061
ViT-Base	Sup	GN+RCR	384	0.9527	0.2752	0.2918	0.5447	0.6481	0.4022	0.6256	0.7032	0.5554
ViT-Base	Sup	GN+RCR+RB	224	0.9924	0.0181	0.0613	0.5401	0.4821	0.0654	0.1674	0.6384	0.3706
ViT-Base	Sup	GN+RCR+RB	384	0.4136	0.0727	0.196	0.5464	0.6384	0.3536	0.6074	0.6902	0.4398
ViT-Base	Sup	GN+RCR+RB+LIB	224	0.9351	0.108	0.1789	0.5401	0.5455	0.1566	0.4666	0.6165	0.4434
ViT-Base	Sup	GN+RCR+RB+LIB	384	0.7823	0.2391	0.2023	0.6003	0.6661	0.4261	0.6762	0.7232	0.5395
ViT-Large	DINOv3	GN+RCR	224	0.9638	0.4409	0.311	0.5674	0.6293	0.2882	0.5468	0.6909	0.5548
ViT-Large	DINOv3	GN+RCR	384	1	0.5741	0.2844	0.6553	0.758	0.4655	0.7148	0.7414	0.6492
ViT-Large	DINOv3	GN+RCR	768	0.984	0.6696	0.4245	0.7277	0.8235	0.576	0.8134	0.8124	0.7289
ViT-Large	DINOv3	GN+RCR+RB	224	0.9996	0.4642	0.3521	0.606	0.6106	0.2572	0.5442	0.6913	0.5656
ViT-Large	DINOv3	GN+RCR+RB	384	0.9989	0.5479	0.3903	0.6666	0.7363	0.4494	0.6928	0.7353	0.6522
ViT-Large	DINOv3	GN+RCR+RB	768	0.9993	0.6836	0.4488	0.72	0.807	0.5966	0.8038	0.7943	0.7317
ViT-Large	DINOv3	GN+RCR+RB+LIB	224	0.9293	0.3994	0.3349	0.6029	0.6464	0.2973	0.5571	0.6843	0.5565
ViT-Large	DINOv3	GN+RCR+RB+LIB	384	1	0.5976	0.3835	0.6874	0.7618	0.4769	0.7132	0.7323	0.6691
ViT-Large	DINOv3	GN+RCR+RB+LIB	768	1	0.7179	0.461	0.7146	0.8409	0.6054	0.8336	0.8194	0.7491
ViT-Large	Sup	GN+RCR	224	0.9072	0.1504	0.2586	0.5516	0.5772	0.2097	0.4393	0.6891	0.4729
ViT-Large	Sup	GN+RCR	384	0.999	0.5263	0.2669	0.6022	0.6805	0.4378	0.6618	0.7016	0.6095
ViT-Large	Sup	GN+RCR+RB	224	0.9945	0.2994	0.2787	0.5722	0.5499	0.0963	0.317	0.6245	0.4666
ViT-Large	Sup	GN+RCR+RB	384	0.9191	0.3117	0.3343	0.604	0.6135	0.2604	0.513	0.6765	0.5291
ViT-Large	Sup	GN+RCR+RB+LIB	224	0.9043	0.1467	0.1807	0.5551	0.5949	0.2542	0.5435	0.675	0.4818
ViT-Large	Sup	GN+RCR+RB+LIB	384	0.842	0.3324	0.2857	0.6245	0.6986	0.412	0.6455	0.7184	0.5699
ViT-Small	DINOv3	GN+RCR	224	0.9698	0.4037	0.3183	0.5779	0.5797	0.1679	0.5132	0.6719	0.5253
ViT-Small	DINOv3	GN+RCR	384	0.9975	0.5195	0.3855	0.6254	0.6544	0.3488	0.6307	0.7127	0.6093
ViT-Small	DINOv3	GN+RCR	768	0.9947	0.6614	0.3898	0.6944	0.7779	0.5832	0.7546	0.786	0.7052
ViT-Small	DINOv3	GN+RCR+RB	224	0.9972	0.3898	0.3408	0.5589	0.5753	0.2	0.507	0.6782	0.5309
ViT-Small	DINOv3	GN+RCR+RB	384	0.9871	0.5122	0.3479	0.6156	0.6736	0.4254	0.5694	0.7114	0.6053
ViT-Small	DINOv3	GN+RCR+RB	768	0.9985	0.6007	0.3893	0.6909	0.7982	0.6027	0.7684	0.7864	0.7044
ViT-Small	DINOv3	GN+RCR+RB+LIB	224	0.9891	0.3119	0.4004	0.5896	0.6097	0.2497	0.3914	0.6468	0.5236
ViT-Small	DINOv3	GN+RCR+RB+LIB	384	0.9924	0.5469	0.3752	0.6454	0.7122	0.4472	0.6487	0.7286	0.6371
ViT-Small	DINOv3	GN+RCR+RB+LIB	768	0.999	0.668	0.434	0.7075	0.8026	0.6015	0.7891	0.7949	0.7245
ViT-Small	Sup	GN+RCR	224	0.8065	0.119	0.2361	0.5657	0.5577	0.1939	0.2552	0.6357	0.4212
ViT-Small	Sup	GN+RCR	384	0.6033	0.1	0.3398	0.6064	0.6253	0.1292	0.52	0.6876	0.4514
ViT-Small	Sup	GN+RCR+RB	224	0.7668	0.0605	0.2464	0.5302	0.5158	0.0921	0.2956	0.6224	0.3912
ViT-Small	Sup	GN+RCR+RB	384	0.9728	0.2874	0.3163	0.5808	0.6176	0.0464	0.547	0.6293	0.4997
ViT-Small	Sup	GN+RCR+RB+LIB	224	0.7659	0.0036	0.2235	0.5328	0.5532	0.1698	0.4558	0.6321	0.4171
ViT-Small	Sup	GN+RCR+RB+LIB	384	0.4344	0.072	0.0574	0.4634	0.1698	0	0.1434	0.5935	0.2417
