# Supplementary material
Source: Research Square preprint supplement (doi:10.21203/rs.3.rs-9405252/v1)
Supplement: Supplementary file 4 [file 70ae438d3e707e1dec19e5ae.xlsx]

## Sheet: Sheet1
Backbone	Pretraining	Batch Size	Resolution	Seed	Epochs	LR	Linear Interpolation Brightness	Random Brightness	Gaussian Noise	Random Crop&Resize	mIoU	Training Time
ViT-Large	DINOv3	12	768	18	100	5e-05	TRUE	0.2	0.01	TRUE	0.7491	2 days, 9:59:45
ViT-Large	DINOv3	12	768	21	10	5e-05	TRUE	0.2	0.01	TRUE	0.7486	05:45:48
ViT-Large	DINOv3	12	768	31	10	5e-05	TRUE	0.2	0.01	TRUE	0.7457	05:45:20
ViT-Large	DINOv3	12	768	41	10	5e-05	TRUE	0.2	0.01	TRUE	0.7428	05:45:04
ViT-Base	DINOv3	28	768	41	10	5e-05	TRUE	0.2	0.01	TRUE	0.7342	02:04:24
ViT-Large	DINOv3	16	768	42	100	1e-05	FALSE	0.2	0.01	TRUE	0.7317	06:23:39
ViT-Base	DINOv3	28	768	11	50	5e-05	FALSE	0.2	0.01	TRUE	0.7315	01:34:18
ViT-Large	DINOv3	12	768	11	50	5e-05	FALSE	0.2	0.01	TRUE	0.7307	03:13:30
ViT-Base	DINOv3	28	768	11	50	5e-05	FALSE	0	0.01	TRUE	0.7302	01:30:59
ViT-Base	DINOv3	28	768	11	10	5e-05	TRUE	0.2	0.01	TRUE	0.7296	02:04:19
ViT-Large	DINOv3	12	768	21	50	5e-05	FALSE	0	0.01	TRUE	0.7289	03:13:52
ViT-Small	DINOv3	22	768	11	10	5e-05	TRUE	0.2	0.01	TRUE	0.7245	02:22:35
ViT-Large	DINOv3	12	768	11	10	5e-05	TRUE	0.2	0.01	TRUE	0.7225	05:45:27
ViT-Base	DINOv3	28	768	10	50	5e-05	FALSE	0.2	0.01	TRUE	0.7219	01:32:58
ViT-Large	DINOv3	12	768	11	50	5e-05	FALSE	0	0.01	TRUE	0.7215	03:13:40
ViT-Large	DINOv3	12	768	21	50	5e-05	FALSE	0.2	0.01	TRUE	0.7189	03:13:40
ViT-Base	DINOv3	28	768	20	50	5e-05	FALSE	0	0.01	TRUE	0.7178	01:34:19
ViT-Base	DINOv3	28	768	20	50	5e-05	FALSE	0.2	0.01	TRUE	0.7166	01:33:10
ViT-Base	DINOv3	28	768	40	10	5e-05	TRUE	0.2	0.01	TRUE	0.7153	02:04:03
ViT-Base	DINOv3	28	768	10	100	5e-05	TRUE	0.2	0.01	TRUE	0.715	20:43:06
ViT-Small	DINOv3	22	768	41	10	5e-05	TRUE	0.2	0.01	TRUE	0.714	02:21:14
ViT-Base	DINOv3	28	768	50	10	5e-05	TRUE	0.2	0.01	TRUE	0.7111	02:04:12
ConvNeXt-Base	DINOv3	24	768	18	100	5e-05	FALSE	0	0.01	TRUE	0.7084	03:21:17
ViT-Base	DINOv3	28	768	10	50	5e-05	FALSE	0	0.01	TRUE	0.7057	01:33:24
ViT-Base	DINOv3	28	768	18	100	5e-05	TRUE	0.2	0.01	TRUE	0.7053	21:07:29
ViT-Small	DINOv3	22	768	11	50	5e-05	FALSE	0	0.01	TRUE	0.7052	02:17:20
ViT-Small	DINOv3	22	768	21	50	5e-05	FALSE	0.2	0.01	TRUE	0.7044	02:17:33
ConvNeXt-Large	DINOv3	12	768	18	100	5e-05	TRUE	0.2	0.01	TRUE	0.7028	1 day, 3:27:10
ViT-Small	DINOv3	22	768	31	50	5e-05	FALSE	0	0.01	TRUE	0.7027	02:16:42
ViT-Base	DINOv3	28	768	41	50	5e-05	FALSE	0.2	0.01	TRUE	0.7019	01:31:09
ConvNeXt-Base	DINOv3	24	768	50	10	5e-05	TRUE	0.2	0.01	TRUE	0.6996	01:29:54
ViT-Base	DINOv3	28	768	21	50	5e-05	FALSE	0.2	0.01	TRUE	0.6995	01:45:54
ViT-Base	DINOv3	28	768	31	50	5e-05	FALSE	0	0.01	TRUE	0.6995	01:30:53
ViT-Base	DINOv3	28	768	30	10	5e-05	TRUE	0.2	0.01	TRUE	0.6983	02:04:22
ViT-Base	DINOv3	28	768	21	50	5e-05	FALSE	0	0.01	TRUE	0.6983	01:30:59
ViT-Base	DINOv3	28	768	20	28	5e-05	TRUE	0.2	0.01	TRUE	0.6981	05:35:45
ViT-Small	DINOv3	22	768	11	50	5e-05	FALSE	0.2	0.01	TRUE	0.698	02:17:23
ViT-Small	DINOv3	22	768	21	10	5e-05	TRUE	0.2	0.01	TRUE	0.6972	02:22:36
ViT-Small	DINOv3	22	768	31	10	5e-05	TRUE	0.2	0.01	TRUE	0.6966	02:22:42
ViT-Base	DINOv3	32	768	42	100	1e-05	FALSE	0.2	0.01	TRUE	0.6946	03:05:14
ConvNeXt-Base	DINOv3	24	768	31	10	5e-05	TRUE	0.2	0.01	TRUE	0.6938	01:29:40
ConvNeXt-Large	DINOv3	16	768	42	100	1e-05	FALSE	0.2	0.01	TRUE	0.6937	04:21:53
ViT-Base	DINOv3	32	768	18	100	5e-05	FALSE	0	0.01	TRUE	0.6937	03:08:02
ViT-Base	DINOv3	28	768	41	50	5e-05	FALSE	0	0.01	TRUE	0.693	01:31:06
ViT-Small	DINOv3	48	768	42	70	5e-05	TRUE	0.2	0.01	TRUE	0.6909	07:37:46
ViT-Base	DINOv3	28	768	31	50	5e-05	FALSE	0.2	0.01	TRUE	0.6901	01:30:55
ConvNeXt-Large	DINOv3	12	768	10	50	5e-05	FALSE	0	0.01	TRUE	0.6893	02:12:08
ConvNeXt-Large	DINOv3	12	768	61	50	5e-05	FALSE	0.2	0.01	FALSE	0.6886	02:11:24
ViT-Large	DINOv3	16	768	18	100	5e-05	FALSE	0	0.01	TRUE	0.6883	06:27:36
ConvNeXt-Large	DINOv3	12	768	51	50	5e-05	FALSE	0.2	0.01	FALSE	0.6863	02:11:28
ConvNeXt-Base	DINOv3	24	768	55	50	5e-05	FALSE	0	0.01	TRUE	0.6861	01:35:47
ViT-Small	DINOv3	22	768	21	50	5e-05	FALSE	0	0.01	TRUE	0.686	02:17:09
ConvNeXt-Small	DINOv3	32	768	18	100	5e-05	FALSE	0	0.01	TRUE	0.6831	02:57:08
ConvNeXt-Base	DINOv3	24	768	30	10	5e-05	TRUE	0.2	0.01	TRUE	0.6818	01:29:42
ConvNeXt-Base	DINOv3	24	768	60	10	5e-05	TRUE	0.2	0.01	TRUE	0.6818	01:29:42
ConvNeXt-Base	DINOv3	24	768	55	10	5e-05	TRUE	0.2	0.01	TRUE	0.6812	01:30:08
ConvNeXt-Base	DINOv3	24	768	21	50	5e-05	FALSE	0.2	0.01	TRUE	0.6807	01:34:18
ConvNeXt-Large	DINOv3	12	768	21	10	5e-05	TRUE	0.2	0.01	TRUE	0.68	02:41:52
ConvNeXt-Base	DINOv3	24	768	42	100	1e-05	FALSE	0.2	0.01	TRUE	0.6799	03:09:57
ConvNeXt-Base	DINOv3	24	768	40	10	5e-05	TRUE	0.2	0.01	TRUE	0.6798	01:29:48
ConvNeXt-Base	DINOv3	24	768	11	50	5e-05	FALSE	0.2	0.01	TRUE	0.6797	01:34:19
ConvNeXt-Base	DINOv3	24	768	65	50	5e-05	FALSE	0	0.01	TRUE	0.6794	01:36:03
ConvNeXt-Tiny	DINOv3	42	768	20	60	5e-05	FALSE	0.2	0.01	TRUE	0.6782	01:34:21
ConvNeXt-Small	DINOv3	32	768	10	50	5e-05	FALSE	0.2	0.01	TRUE	0.6781	01:26:51
ConvNeXt-Base	DINOv3	24	768	20	10	5e-05	TRUE	0.2	0.01	TRUE	0.6777	01:29:44
ConvNeXt-Base	DINOv3	24	768	25	50	5e-05	FALSE	0	0.01	TRUE	0.6771	01:35:48
ConvNeXt-Small	DINOv3	32	768	20	50	5e-05	FALSE	0.2	0.01	TRUE	0.6761	01:26:51
ConvNeXt-Base	DINOv3	24	768	41	50	5e-05	FALSE	0	0.01	TRUE	0.676	01:33:47
ViT-Small	DINOv3	22	768	31	50	5e-05	FALSE	0.2	0.01	TRUE	0.6756	02:17:16
ConvNeXt-Base	DINOv3	24	768	25	10	5e-05	TRUE	0.2	0.01	TRUE	0.6747	01:30:18
ConvNeXt-Base	DINOv3	24	768	10	10	5e-05	TRUE	0.2	0.01	TRUE	0.6736	01:29:44
ConvNeXt-Base	DINOv3	24	768	20	50	5e-05	FALSE	0.2	0.01	TRUE	0.6734	01:36:41
ConvNeXt-Large	DINOv3	12	768	10	50	5e-05	FALSE	0	0.01	TRUE	0.6727	02:12:08
ConvNeXt-Base	DINOv3	24	768	35	50	5e-05	FALSE	0	0.01	TRUE	0.6716	01:36:00
ConvNeXt-Base	DINOv3	24	768	45	50	5e-05	FALSE	0	0.01	TRUE	0.671	01:35:55
ConvNeXt-Base	DINOv3	24	768	40	50	5e-05	FALSE	0.2	0.01	TRUE	0.6709	01:37:09
ConvNeXt-Base	DINOv3	24	768	11	50	5e-05	FALSE	0	0.01	TRUE	0.6703	01:34:06
ConvNeXt-Large	DINOv3	12	768	41	10	5e-05	TRUE	0.2	0.01	TRUE	0.6697	02:41:42
ViT-Large	DINOv3	48	384	42	40	5e-05	TRUE	0.2	0.01	TRUE	0.6691	04:19:20
ConvNeXt-Small	DINOv3	28	768	21	10	5e-05	TRUE	0.2	0.01	TRUE	0.6684	01:06:21
ConvNeXt-Base	DINOv3	24	768	21	50	5e-05	FALSE	0	0.01	TRUE	0.667	01:33:52
ConvNeXt-Large	DINOv3	12	768	11	10	5e-05	TRUE	0.2	0.01	TRUE	0.6661	02:41:51
ViT-Small	DINOv3	48	768	18	100	5e-05	FALSE	0	0.01	TRUE	0.6652	02:14:00
ConvNeXt-Tiny	DINOv3	42	768	30	60	5e-05	FALSE	0.2	0.01	TRUE	0.6637	01:34:44
ConvNeXt-Large	DINOv3	48	384	42	40	5e-05	TRUE	0.2	0.01	TRUE	0.6635	02:58:15
ConvNeXt-Base	DINOv3	24	768	31	50	5e-05	FALSE	0	0.01	TRUE	0.6603	01:34:00
ConvNeXt-Tiny	DINOv3	42	768	10	52	5e-05	FALSE	0.2	0.01	TRUE	0.66	01:18:00
ConvNeXt-Base	DINOv3	24	768	41	10	5e-05	TRUE	0.2	0.01	TRUE	0.6588	01:29:33
ConvNeXt-Large	DINOv3	12	768	51	10	5e-05	TRUE	0.2	0.01	TRUE	0.6573	02:42:52
ConvNeXt-Small	DINOv3	32	768	42	100	1e-05	FALSE	0.2	0.01	TRUE	0.6568	02:50:11
ConvNeXt-Tiny	DINOv3	14	768	41	8	5e-05	TRUE	0.2	0.01	TRUE	0.6561	02:21:49
ConvNeXt-Large	DINOv3	16	768	18	100	5e-05	FALSE	0	0.01	TRUE	0.656	04:26:58
ConvNeXt-Base	DINOv3	24	768	15	50	5e-05	FALSE	0	0.01	TRUE	0.656	01:35:49
ConvNeXt-Small	DINOv3	28	768	31	50	5e-05	FALSE	0	0.01	TRUE	0.6554	01:27:47
ConvNeXt-Large	DINOv3	48	384	21	50	5e-05	FALSE	0.2	0.01	TRUE	0.6553	00:44:07
ConvNeXt-Large	DINOv3	12	768	61	50	5e-05	FALSE	0.2	0.01	TRUE	0.655	02:11:02
ConvNeXt-Small	DINOv3	28	768	31	10	5e-05	TRUE	0.2	0.01	TRUE	0.6543	01:06:36
ConvNeXt-Base	DINOv3	24	768	30	50	5e-05	FALSE	0.2	0.01	TRUE	0.6528	01:37:02
ConvNeXt-Tiny	DINOv3	42	768	60	60	5e-05	FALSE	0.2	0.01	TRUE	0.6522	01:37:56
ViT-Large	DINOv3	48	384	20	50	5e-05	FALSE	0.2	0.01	TRUE	0.6522	00:49:28
ViT-Large	DINOv3	48	384	11	50	5e-05	FALSE	0.2	0.01	TRUE	0.6521	00:50:14
ConvNeXt-Large	DINOv3	12	768	10	50	5e-05	FALSE	0	0.01	TRUE	0.6521	02:12:08
ConvNeXt-Base	DINOv3	24	768	31	50	5e-05	FALSE	0.2	0.01	TRUE	0.6516	01:34:45
ConvNeXt-Base	DINOv3	48	384	50	30	5e-05	TRUE	0.2	0.01	TRUE	0.6492	01:16:37
ViT-Large	DINOv3	48	384	18	100	5e-05	FALSE	0	0.01	TRUE	0.6492	01:40:54
ConvNeXt-Small	DINOv3	28	768	41	50	5e-05	FALSE	0	0.01	TRUE	0.6487	01:30:01
ConvNeXt-Tiny	DINOv3	42	768	50	60	5e-05	FALSE	0.2	0.01	TRUE	0.6479	01:34:44
ConvNeXt-Large	DINOv3	48	384	42	100	1e-05	FALSE	0.2	0.01	TRUE	0.6472	01:31:30
ViT-Large	DINOv3	48	384	11	10	5e-05	TRUE	0.2	0.01	TRUE	0.6468	01:03:42
ConvNeXt-Base	DINOv3	48	384	11	10	5e-05	TRUE	0.2	0.01	TRUE	0.6466	00:25:29
ConvNeXt-Base	DINOv3	48	384	30	30	5e-05	TRUE	0.2	0.01	TRUE	0.6464	01:16:42
ConvNeXt-Base	DINOv3	24	768	10	50	5e-05	FALSE	0.2	0.01	TRUE	0.6459	01:36:42
ViT-Small	DINOv3	22	768	41	50	5e-05	FALSE	0	0.01	TRUE	0.6459	02:16:55
ConvNeXt-Base	DINOv3	24	768	41	50	5e-05	FALSE	0.2	0.01	TRUE	0.6458	01:34:21
ConvNeXt-Base	DINOv3	48	384	20	30	5e-05	TRUE	0.2	0.01	TRUE	0.6455	01:16:40
ConvNeXt-Tiny	DINOv3	14	768	21	50	5e-05	FALSE	0	0.01	TRUE	0.6452	02:46:54
ConvNeXt-Base	DINOv3	48	384	18	100	5e-05	FALSE	0	0.01	TRUE	0.6444	01:11:14
ConvNeXt-Tiny	DINOv3	42	768	18	100	5e-05	FALSE	0	0.01	TRUE	0.6428	02:41:25
ConvNeXt-Base	DINOv3	48	384	42	40	5e-05	TRUE	0.2	0.01	TRUE	0.6413	01:44:32
ConvNeXt-Large	DINOv3	12	768	51	50	5e-05	FALSE	0.2	0.01	TRUE	0.64	02:10:47
ConvNeXt-Base	DINOv3	24	768	65	10	5e-05	TRUE	0.2	0.01	TRUE	0.6392	01:30:01
ConvNeXt-Base	DINOv3	48	384	31	50	5e-05	FALSE	0.2	0.01	TRUE	0.6389	00:46:23
ConvNeXt-Small	DINOv3	32	768	42	40	5e-05	TRUE	0.2	0.01	TRUE	0.6388	04:25:52
ConvNeXt-Tiny	DINOv3	42	768	42	40	5e-05	TRUE	0.2	0.01	TRUE	0.6388	03:31:12
ConvNeXt-Tiny	DINOv3	14	768	31	10	5e-05	TRUE	0.2	0.01	TRUE	0.6388	03:21:54
ConvNeXt-Base	DINOv3	24	768	15	10	5e-05	TRUE	0.2	0.01	TRUE	0.6387	01:30:06
ViT-Large	DINOv3	48	384	21	50	5e-05	FALSE	0	0.01	TRUE	0.6387	00:48:29
ViT-Small	DINOv3	48	384	11	10	5e-05	TRUE	0.2	0.01	TRUE	0.6371	00:29:02
ConvNeXt-Small	DINOv3	28	768	21	50	5e-05	FALSE	0	0.01	TRUE	0.6368	01:27:22
ViT-Large	DINOv3	48	384	21	50	5e-05	FALSE	0.2	0.01	TRUE	0.6367	00:50:05
ConvNeXt-Small	DINOv3	28	768	11	10	5e-05	TRUE	0.2	0.01	TRUE	0.6362	01:08:08
ConvNeXt-Tiny	DINOv3	42	768	40	60	5e-05	FALSE	0.2	0.01	TRUE	0.6354	01:34:37
ViT-Base	DINOv3	48	384	20	10	5e-05	TRUE	0.2	0.01	TRUE	0.6353	00:24:22
ConvNeXt-Base	DINOv3	24	768	35	10	5e-05	TRUE	0.2	0.01	TRUE	0.6351	01:30:09
ViT-Large	DINOv3	48	384	21	10	5e-05	TRUE	0.2	0.01	TRUE	0.635	01:03:43
ConvNeXt-Large	DINOv3	16	384	61	50	5e-05	FALSE	0	0.01	TRUE	0.635	01:36:49
ConvNeXt-Tiny	DINOv3	14	768	21	10	5e-05	TRUE	0.2	0.01	TRUE	0.6345	03:26:50
ConvNeXt-Base	DINOv3	28	384	11	50	5e-05	FALSE	0.2	0.01	TRUE	0.6338	01:20:16
ConvNeXt-Base	DINOv3	28	384	21	50	5e-05	FALSE	0	0.01	TRUE	0.6338	01:20:06
ConvNeXt-Large	DINOv3	16	384	71	50	5e-05	FALSE	0	0.01	TRUE	0.6338	01:34:03
ViT-Small	DINOv3	48	768	42	100	1e-05	FALSE	0.2	0.01	TRUE	0.6329	02:13:48
ConvNeXt-Base	DINOv3	28	384	21	50	5e-05	FALSE	0.2	0.01	TRUE	0.6325	01:20:16
ViT-Base	DINOv3	48	384	18	100	5e-05	FALSE	0	0.01	TRUE	0.6324	00:58:34
ConvNeXt-Large	DINOv3	48	384	18	100	5e-05	FALSE	0	0.01	TRUE	0.632	01:31:52
ViT-Large	DINOv3	48	384	11	50	5e-05	FALSE	0	0.01	TRUE	0.632	00:48:52
ConvNeXt-Tiny	DINOv3	14	768	11	10	5e-05	TRUE	0.2	0.01	TRUE	0.6319	03:28:45
ConvNeXt-Base	DINOv3	28	384	11	50	5e-05	FALSE	0	0.01	TRUE	0.6302	01:19:56
ConvNeXt-Base	DINOv3	48	384	42	100	1e-05	FALSE	0.2	0.01	TRUE	0.63	01:10:38
ConvNeXt-Tiny	DINOv3	14	768	11	50	5e-05	FALSE	0	0.01	TRUE	0.6289	02:52:20
ViT-Base	DINOv3	48	384	10	50	5e-05	FALSE	0.2	0.01	TRUE	0.6288	00:27:45
ConvNeXt-Base	DINOv3	48	384	41	50	5e-05	FALSE	0.2	0.01	TRUE	0.6287	00:33:19
ViT-Base	DINOv3	48	384	10	10	5e-05	TRUE	0.2	0.01	TRUE	0.6273	00:24:15
ConvNeXt-Large	DINOv3	48	384	11	50	5e-05	FALSE	0.2	0.01	TRUE	0.6234	00:43:56
ConvNeXt-Base	DINOv3	48	384	11	50	5e-05	FALSE	0.2	0.01	TRUE	0.6229	00:33:50
ConvNeXt-Base	DINOv3	28	384	41	50	5e-05	FALSE	0.2	0.01	TRUE	0.6219	01:20:29
ConvNeXt-Base	DINOv3	48	384	41	50	5e-05	FALSE	0	0.01	TRUE	0.6219	00:33:22
ConvNeXt-Small	DINOv3	48	384	10	50	5e-05	FALSE	0.2	0.01	TRUE	0.6217	00:30:15
ViT-Large	DINOv3	48	384	10	50	5e-05	FALSE	0.2	0.01	TRUE	0.6214	00:48:55
ConvNeXt-Base	DINOv3	48	384	11	50	5e-05	FALSE	0	0.01	TRUE	0.6191	00:33:23
ConvNeXt-Large	DINOv3	48	384	11	10	5e-05	TRUE	0.2	0.01	TRUE	0.619	00:43:14
ViT-Small	DINOv3	48	384	21	10	5e-05	TRUE	0.2	0.01	TRUE	0.6176	00:29:15
ConvNeXt-Base	DINOv3	48	384	10	30	5e-05	TRUE	0.2	0.01	TRUE	0.6174	01:16:29
ConvNeXt-Base	DINOv3	28	384	41	10	5e-05	TRUE	0.2	0.01	TRUE	0.6168	00:53:45
ConvNeXt-Base	DINOv3	48	384	21	50	5e-05	FALSE	0.2	0.01	TRUE	0.6167	00:33:05
ConvNeXt-Base	DINOv3	28	384	11	10	5e-05	TRUE	0.2	0.01	TRUE	0.6159	00:54:29
ConvNeXt-Small	DINOv3	36	384	21	50	5e-05	FALSE	0	0.01	TRUE	0.6159	01:14:21
ViT-Base	DINOv3	48	384	20	50	5e-05	FALSE	0.2	0.01	TRUE	0.6158	00:28:01
ConvNeXt-Small	DINOv3	36	384	11	10	5e-05	TRUE	0.2	0.01	TRUE	0.6155	00:39:29
ConvNeXt-Base	DINOv3	48	384	60	30	5e-05	TRUE	0.2	0.01	TRUE	0.6153	01:16:37
ViT-Small	DINOv3	48	384	41	10	5e-05	TRUE	0.2	0.01	TRUE	0.6143	00:29:09
ConvNeXt-Base	DINOv3	48	384	21	50	5e-05	FALSE	0	0.01	TRUE	0.6132	00:33:11
ConvNeXt-Large	DINOv3	42	224	51	10	5e-05	TRUE	0.2	0.01	TRUE	0.6127	00:38:45
ConvNeXt-Large	DINOv3	42	224	61	10	5e-05	TRUE	0.2	0.01	TRUE	0.6122	00:38:35
ConvNeXt-Base	DINOv3	28	384	31	50	5e-05	FALSE	0.2	0.01	TRUE	0.6103	01:20:04
ConvNeXt-Tiny	DINOv3	14	768	41	50	5e-05	FALSE	0	0.01	TRUE	0.6101	02:47:21
ConvNeXt-Small	DINOv3	36	384	11	50	5e-05	FALSE	0	0.01	TRUE	0.61	01:14:08
ViT-Small	DINOv3	48	384	11	50	5e-05	FALSE	0	0.01	TRUE	0.6093	01:07:43
ViT-Small	DINOv3	48	384	18	100	5e-05	FALSE	0	0.01	TRUE	0.6093	00:44:58
ConvNeXt-Base	DINOv3	48	384	40	30	5e-05	TRUE	0.2	0.01	TRUE	0.609	01:16:37
ConvNeXt-Large	DINOv3	48	384	11	50	5e-05	FALSE	0.2	0.01	FALSE	0.6089	00:44:18
ConvNeXt-Base	DINOv3	28	384	31	50	5e-05	FALSE	0	0.01	TRUE	0.6087	01:19:52
ViT-Base	DINOv3	48	384	10	50	5e-05	FALSE	0	0.01	TRUE	0.6081	00:27:53
ConvNeXt-Large	DINOv3	42	224	21	50	5e-05	FALSE	0.2	0.01	TRUE	0.6076	01:09:11
ConvNeXt-Small	DINOv3	36	384	31	10	5e-05	TRUE	0.2	0.01	TRUE	0.6069	00:40:11
ViT-Small	DINOv3	22	768	41	50	5e-05	FALSE	0.2	0.01	TRUE	0.6064	02:17:28
ConvNeXt-Tiny	DINOv3	48	384	42	90	5e-05	TRUE	0.2	0.01	TRUE	0.6058	02:11:14
ViT-Small	DINOv3	48	384	31	50	5e-05	FALSE	0.2	0.01	TRUE	0.6053	01:08:14
ConvNeXt-Tiny	DINOv3	14	768	31	50	5e-05	FALSE	0	0.01	TRUE	0.6047	02:47:25
ConvNeXt-Small	DINOv3	48	384	18	100	5e-05	FALSE	0	0.01	TRUE	0.6043	01:03:31
ConvNeXt-Small	DINOv3	48	384	10	10	5e-05	TRUE	0.2	0.01	TRUE	0.602	00:19:17
ViT-Base	DINOv3	48	384	20	50	5e-05	FALSE	0	0.01	TRUE	0.6019	00:27:39
ConvNeXt-Tiny	DINOv3	48	384	18	100	5e-05	FALSE	0	0.01	TRUE	0.6015	00:58:18
ConvNeXt-Base	DINOv3	28	384	21	10	5e-05	TRUE	0.2	0.01	TRUE	0.6012	00:54:15
ConvNeXt-Tiny	DINOv3	48	384	11	10	5e-05	TRUE	0.2	0.01	TRUE	0.6008	00:30:06
ConvNeXt-Base	DINOv3	48	384	41	10	5e-05	TRUE	0.2	0.01	TRUE	0.5995	00:25:27
ConvNeXt-Base	DINOv3	48	384	31	50	5e-05	FALSE	0	0.01	TRUE	0.5984	00:33:22
ConvNeXt-Large	DINOv3	48	384	21	10	5e-05	TRUE	0.2	0.01	TRUE	0.5981	00:43:20
ViT-Small	DINOv3	48	384	11	50	5e-05	FALSE	0.2	0.01	TRUE	0.5973	01:09:14
ViT-Small	DINOv3	48	384	31	50	5e-05	FALSE	0	0.01	TRUE	0.5973	01:07:46
ConvNeXt-Tiny	DINOv3	48	384	21	10	5e-05	TRUE	0.2	0.01	TRUE	0.5962	00:30:17
ViT-Small	DINOv3	48	384	21	50	5e-05	FALSE	0	0.01	TRUE	0.5959	01:07:50
ConvNeXt-Large	DINOv3	16	384	51	50	5e-05	FALSE	0	0.01	TRUE	0.595	01:37:19
ViT-Base	DINOv3	48	384	42	40	5e-05	TRUE	0.2	0.01	TRUE	0.5945	01:38:53
ConvNeXt-Small	DINOv3	48	384	20	10	5e-05	TRUE	0.2	0.01	TRUE	0.5941	00:19:22
ConvNeXt-Tiny	DINOv3	48	384	31	50	5e-05	FALSE	0	0.01	TRUE	0.5925	01:10:54
ViT-Small	DINOv3	48	384	31	10	5e-05	TRUE	0.2	0.01	TRUE	0.5918	00:29:10
ViT-Small	DINOv3	48	384	41	50	5e-05	FALSE	0.2	0.01	TRUE	0.5907	01:08:04
ConvNeXt-Small	DINOv3	36	384	21	50	5e-05	FALSE	0.2	0.01	TRUE	0.5899	01:14:27
ViT-Small	DINOv3	48	384	21	50	5e-05	FALSE	0.2	0.01	TRUE	0.5887	01:08:47
ConvNeXt-Tiny	DINOv3	48	384	21	50	5e-05	FALSE	0.2	0.01	TRUE	0.5883	01:11:08
ConvNeXt-Base	DINOv3	48	224	31	10	5e-05	TRUE	0.2	0.01	TRUE	0.5882	00:26:12
ConvNeXt-Base	DINOv3	28	384	41	50	5e-05	FALSE	0	0.01	TRUE	0.5877	01:19:56
ConvNeXt-Tiny	DINOv3	48	384	31	50	5e-05	FALSE	0.2	0.01	TRUE	0.5876	01:11:09
ConvNeXt-Tiny	DINOv3	48	384	31	10	5e-05	TRUE	0.2	0.01	TRUE	0.5854	00:30:18
ConvNeXt-Small	DINOv3	36	384	11	50	5e-05	FALSE	0.2	0.01	TRUE	0.5847	01:14:21
ConvNeXt-Tiny	DINOv3	48	384	11	50	5e-05	FALSE	0	0.01	TRUE	0.5846	01:10:45
ConvNeXt-Small	DINOv3	36	384	21	10	5e-05	TRUE	0.2	0.01	TRUE	0.5843	00:43:06
ConvNeXt-Small	DINOv3	48	384	42	100	1e-05	FALSE	0.2	0.01	TRUE	0.5836	01:03:33
ViT-Small	DINOv3	48	384	41	50	5e-05	FALSE	0	0.01	TRUE	0.5829	01:07:50
ConvNeXt-Base	DINOv3	48	224	11	10	5e-05	TRUE	0.2	0.01	TRUE	0.5811	00:25:54
ConvNeXt-Tiny	DINOv3	48	384	42	100	1e-05	FALSE	0.2	0.01	TRUE	0.5806	01:18:25
ViT-Base	DINOv3	48	384	42	100	1e-05	FALSE	0.2	0.01	TRUE	0.5805	01:00:41
ConvNeXt-Tiny	Sup	48	224	30	10	5e-05	TRUE	0.2	0.01	TRUE	0.5782	00:08:40
ConvNeXt-Tiny	DINOv3	48	384	11	50	5e-05	FALSE	0.2	0.01	TRUE	0.5778	01:11:08
ConvNeXt-Small	DINOv3	48	384	42	40	5e-05	TRUE	0.2	0.01	TRUE	0.5768	01:17:57
ConvNeXt-Large	DINOv3	42	224	61	50	5e-05	FALSE	0	0.01	TRUE	0.5747	01:08:38
ConvNeXt-Tiny	DINOv3	48	384	21	50	5e-05	FALSE	0	0.01	TRUE	0.5742	01:11:02
ConvNeXt-Small	DINOv3	36	384	31	50	5e-05	FALSE	0	0.01	TRUE	0.574	01:16:50
ConvNeXt-Small	DINOv3	36	384	31	50	5e-05	FALSE	0.2	0.01	TRUE	0.572	01:14:15
ConvNeXt-Large	DINOv3	48	224	18	100	5e-05	FALSE	0	0.01	TRUE	0.5706	00:54:11
ConvNeXt-Base	DINOv3	48	224	31	50	5e-05	FALSE	0	0.01	TRUE	0.5701	01:03:30
ConvNeXt-Tiny	DINOv3	48	224	18	100	5e-05	TRUE	0.2	0.01	TRUE	0.5698	01:21:15
ConvNeXt-Base	DINOv3	48	384	21	10	5e-05	TRUE	0.2	0.01	TRUE	0.5691	00:25:27
ConvNeXt-Small	DINOv3	48	384	20	50	5e-05	FALSE	0.2	0.01	TRUE	0.5675	00:30:09
ConvNeXt-Base	DINOv3	48	224	42	60	5e-05	TRUE	0.2	0.01	TRUE	0.5671	02:33:52
ViT-Large	DINOv3	48	224	31	50	5e-05	FALSE	0.2	0.01	TRUE	0.5656	00:28:30
ConvNeXt-Tiny	Sup	48	224	20	10	5e-05	TRUE	0.2	0.01	TRUE	0.5649	00:09:01
ConvNeXt-Base	DINOv3	48	224	11	50	5e-05	FALSE	0	0.01	TRUE	0.5619	01:03:30
ConvNeXt-Tiny	Sup	48	224	20	100	5e-05	FALSE	0	0.01	TRUE	0.5598	00:36:06
ConvNeXt-Tiny	Sup	48	224	20	10	5e-05	TRUE	0	0.01	TRUE	0.5571	00:08:17
ViT-Large	DINOv3	48	224	31	10	5e-05	TRUE	0.2	0.01	TRUE	0.5565	00:25:03
ConvNeXt-Large	DINOv3	42	224	51	50	5e-05	FALSE	0	0.01	TRUE	0.5562	01:09:05
ConvNeXt-Large	DINOv3	48	224	42	100	1e-05	FALSE	0.2	0.01	TRUE	0.5556	00:54:38
ViT-Large	DINOv3	48	224	21	50	5e-05	FALSE	0	0.01	TRUE	0.5548	00:28:16
ConvNeXt-Base	DINOv3	48	224	21	50	5e-05	FALSE	0	0.01	TRUE	0.5539	01:03:30
ConvNeXt-Tiny	Sup	48	224	50	100	5e-05	FALSE	0	0.01	TRUE	0.5539	00:36:09
ConvNeXt-Small	DINOv3	48	224	11	50	5e-05	FALSE	0	0.01	TRUE	0.5533	01:00:41
ConvNeXt-Tiny	Sup	48	224	30	100	5e-05	FALSE	0	0.01	TRUE	0.5514	00:36:03
ConvNeXt-Base	DINOv3	48	224	31	50	5e-05	FALSE	0.2	0.01	TRUE	0.5508	01:03:51
ConvNeXt-Tiny	DINOv3	48	224	50	100	5e-05	FALSE	0	0.01	TRUE	0.5507	00:36:37
ViT-Large	DINOv3	48	224	18	100	5e-05	FALSE	0	0.01	TRUE	0.55	00:59:22
ConvNeXt-Base	DINOv3	48	224	42	100	1e-05	FALSE	0.2	0.01	TRUE	0.5497	02:03:59
ConvNeXt-Base	DINOv3	48	224	18	100	5e-05	FALSE	0	0.01	TRUE	0.5484	00:43:52
ConvNeXt-Large	DINOv3	48	384	21	50	5e-05	FALSE	0.2	0.01	FALSE	0.5479	00:44:22
ViT-Base	DINOv3	48	224	11	50	5e-05	FALSE	0.2	0.01	TRUE	0.5474	01:01:50
ConvNeXt-Tiny	Sup	48	224	20	100	5e-05	FALSE	0.2	0.01	TRUE	0.5466	00:36:59
ViT-Large	DINOv3	48	224	21	50	5e-05	FALSE	0.2	0.01	TRUE	0.5462	00:28:21
ConvNeXt-Tiny	DINOv3	48	224	40	100	5e-05	FALSE	0.2	0.01	TRUE	0.5451	00:37:30
ViT-Small	DINOv3	48	224	20	10	5e-05	TRUE	0	0.01	TRUE	0.545	00:07:29
ViT-Small	DINOv3	48	384	42	100	1e-05	FALSE	0.2	0.01	TRUE	0.5449	00:48:05
ViT-Small	DINOv3	48	224	10	10	5e-05	TRUE	0	0.01	TRUE	0.5445	00:07:31
ViT-Base	DINOv3	48	224	42	60	5e-05	TRUE	0.2	0.01	TRUE	0.544	02:20:06
ConvNeXt-Tiny	Sup	48	224	50	10	5e-05	TRUE	0.2	0.01	TRUE	0.5434	00:08:37
ConvNeXt-Tiny	Sup	48	224	40	10	5e-05	TRUE	0.2	0.01	TRUE	0.5431	00:08:40
ConvNeXt-Base	DINOv3	48	224	41	50	5e-05	FALSE	0	0.01	TRUE	0.5423	01:03:33
ViT-Base	DINOv3	48	224	18	100	5e-05	FALSE	0	0.01	TRUE	0.542	00:37:50
ConvNeXt-Tiny	Sup	48	224	18	100	5e-05	TRUE	0.2	0.01	TRUE	0.542	01:22:38
ViT-Large	DINOv3	48	224	21	10	5e-05	TRUE	0.2	0.01	TRUE	0.5413	00:25:08
ConvNeXt-Small	DINOv3	48	224	51	50	5e-05	FALSE	0	0.01	TRUE	0.5412	01:00:49
ViT-Large	DINOv3	48	224	42	60	5e-05	TRUE	0.2	0.01	TRUE	0.5404	08:25:31
ConvNeXt-Tiny	DINOv3	48	224	42	60	5e-05	FALSE	0	0.01	TRUE	0.5399	01:11:12
ConvNeXt-Tiny	DINOv3	48	224	10	10	5e-05	TRUE	0.2	0.01	TRUE	0.5397	00:08:39
ViT-Base	DINOv3	48	224	11	50	5e-05	FALSE	0	0.01	TRUE	0.5386	01:01:11
ConvNeXt-Tiny	Sup	48	224	10	10	5e-05	TRUE	0.2	0.01	TRUE	0.5386	00:08:39
ConvNeXt-Tiny	Sup	48	224	50	10	5e-05	TRUE	0	0.01	TRUE	0.5374	00:08:08
ConvNeXt-Small	DINOv3	48	224	42	40	5e-05	TRUE	0.2	0.01	TRUE	0.5371	01:24:31
ViT-Base	DINOv3	48	224	31	50	5e-05	FALSE	0	0.01	TRUE	0.536	01:01:07
ConvNeXt-Small	DINOv3	48	224	42	100	1e-05	FALSE	0.2	0.01	TRUE	0.5344	01:58:34
ConvNeXt-Tiny	DINOv3	48	224	18	100	5e-05	TRUE	0	0.01	TRUE	0.5328	01:15:47
ConvNeXt-Tiny	Sup	48	224	10	100	5e-05	FALSE	0.2	0.01	TRUE	0.5328	00:36:50
ConvNeXt-Tiny	Sup	48	224	18	100	5e-05	FALSE	0.2	0.01	TRUE	0.5322	00:34:22
ViT-Large	DINOv3	48	224	31	50	5e-05	FALSE	0	0.01	TRUE	0.532	00:28:12
ConvNeXt-Large	DINOv3	48	224	31	10	5e-05	TRUE	0.2	0.01	TRUE	0.5319	00:18:59
ViT-Small	DINOv3	48	224	10	100	5e-05	FALSE	0.2	0.01	TRUE	0.5309	00:32:36
ConvNeXt-Small	DINOv3	48	224	41	10	5e-05	TRUE	0.2	0.01	TRUE	0.5308	00:21:21
ConvNeXt-Tiny	DINOv3	48	224	42	100	1e-05	FALSE	0.2	0.01	TRUE	0.5304	01:56:40
ConvNeXt-Small	DINOv3	48	224	18	100	5e-05	FALSE	0	0.01	TRUE	0.5304	00:39:58
ViT-Base	DINOv3	48	224	41	50	5e-05	FALSE	0.2	0.01	TRUE	0.5293	01:01:32
ConvNeXt-Tiny	Sup	48	224	50	100	5e-05	FALSE	0.2	0.01	TRUE	0.5293	00:37:34
ConvNeXt-Tiny	DINOv3	48	224	50	100	5e-05	FALSE	0.2	0.01	TRUE	0.5292	00:37:59
ConvNeXt-Tiny	DINOv3	48	224	40	10	5e-05	TRUE	0.2	0.01	TRUE	0.5285	00:08:37
ViT-Small	DINOv3	48	224	40	100	5e-05	FALSE	0.2	0.01	TRUE	0.5277	00:32:36
ConvNeXt-Tiny	DINOv3	48	224	20	10	5e-05	TRUE	0	0.01	TRUE	0.5276	00:08:19
ViT-Small	DINOv3	48	224	30	10	5e-05	TRUE	0	0.01	TRUE	0.5273	00:07:29
ConvNeXt-Base	DINOv3	48	224	21	50	5e-05	FALSE	0.2	0.01	TRUE	0.5268	01:03:58
ConvNeXt-Tiny	Sup	48	224	18	100	5e-05	TRUE	0	0.01	TRUE	0.5267	01:16:30
ViT-Large	DINOv3	48	224	11	50	5e-05	FALSE	0	0.01	TRUE	0.5267	00:28:13
ViT-Large	DINOv3	48	224	11	10	5e-05	TRUE	0.2	0.01	TRUE	0.5267	00:25:06
ViT-Small	DINOv3	48	224	42	60	5e-05	FALSE	0	0.01	TRUE	0.5253	01:09:05
ViT-Base	DINOv3	48	224	41	10	5e-05	TRUE	0.2	0.01	TRUE	0.5251	00:23:34
ViT-Base	DINOv3	48	224	21	50	5e-05	FALSE	0.2	0.01	TRUE	0.5248	01:01:30
ViT-Small	DINOv3	48	224	18	100	5e-05	TRUE	0.2	0.01	TRUE	0.5236	01:19:12
ConvNeXt-Tiny	DINOv3	48	224	42	40	5e-05	TRUE	0.2	0.01	TRUE	0.5226	01:14:36
ViT-Large	DINOv3	48	224	11	50	5e-05	FALSE	0.2	0.01	TRUE	0.5222	00:28:46
ConvNeXt-Small	DINOv3	48	224	21	50	5e-05	FALSE	0	0.01	TRUE	0.5217	01:00:44
ViT-Base	DINOv3	48	224	31	50	5e-05	FALSE	0.2	0.01	TRUE	0.5208	01:01:33
ConvNeXt-Small	DINOv3	48	224	21	10	5e-05	TRUE	0.2	0.01	TRUE	0.5206	00:21:20
ViT-Base	DINOv3	48	224	11	10	5e-05	TRUE	0.2	0.01	TRUE	0.5205	00:23:33
ViT-Small	DINOv3	48	224	10	10	5e-05	TRUE	0.2	0.01	TRUE	0.5203	00:08:39
ViT-Small	DINOv3	48	224	20	100	5e-05	FALSE	0	0.01	TRUE	0.5202	00:31:38
ConvNeXt-Tiny	Sup	48	224	40	10	5e-05	TRUE	0	0.01	TRUE	0.5201	00:09:12
ConvNeXt-Tiny	DINOv3	48	224	50	10	5e-05	TRUE	0.2	0.01	TRUE	0.5196	00:08:39
ViT-Small	DINOv3	48	224	18	100	5e-05	TRUE	0	0.01	TRUE	0.5192	01:09:55
ConvNeXt-Tiny	DINOv3	48	224	20	10	5e-05	TRUE	0.2	0.01	TRUE	0.5187	00:08:39
ViT-Base	DINOv3	48	224	21	50	5e-05	FALSE	0	0.01	TRUE	0.518	01:01:32
ViT-Small	DINOv3	48	224	50	10	5e-05	TRUE	0.2	0.01	TRUE	0.518	00:08:29
ConvNeXt-Tiny	Sup	48	224	42	60	5e-05	FALSE	0	0.01	TRUE	0.5178	01:11:03
ViT-Small	DINOv3	48	224	30	100	5e-05	FALSE	0.2	0.01	TRUE	0.5172	00:32:37
ConvNeXt-Small	DINOv3	48	224	21	50	5e-05	FALSE	0.2	0.01	TRUE	0.5172	01:01:06
ViT-Small	DINOv3	48	224	50	10	5e-05	TRUE	0	0.01	TRUE	0.5163	00:07:28
ViT-Small	DINOv3	48	224	10	100	5e-05	FALSE	0	0.01	TRUE	0.5159	00:31:43
ConvNeXt-Tiny	Sup	48	224	10	100	5e-05	FALSE	0	0.01	TRUE	0.5157	00:36:03
ConvNeXt-Tiny	Sup	48	224	30	100	5e-05	FALSE	0.2	0.01	TRUE	0.5141	00:37:00
ConvNeXt-Base	DINOv3	48	224	21	10	5e-05	TRUE	0.2	0.01	TRUE	0.514	00:26:21
ViT-Base	DINOv3	48	224	41	50	5e-05	FALSE	0	0.01	TRUE	0.514	01:01:21
ConvNeXt-Tiny	DINOv3	48	224	40	10	5e-05	TRUE	0	0.01	TRUE	0.5139	00:08:18
ConvNeXt-Small	DINOv3	48	224	41	50	5e-05	FALSE	0.2	0.01	TRUE	0.5138	01:01:01
ConvNeXt-Base	DINOv3	48	224	41	10	5e-05	TRUE	0.2	0.01	TRUE	0.513	00:26:03
ConvNeXt-Small	DINOv3	48	224	31	50	5e-05	FALSE	0.2	0.01	TRUE	0.512	01:01:07
ConvNeXt-Base	DINOv3	48	224	41	50	5e-05	FALSE	0.2	0.01	TRUE	0.5117	01:03:53
ConvNeXt-Tiny	Sup	48	224	18	100	5e-05	FALSE	0	0.01	TRUE	0.5113	00:37:32
ViT-Base	DINOv3	48	224	31	10	5e-05	TRUE	0.2	0.01	TRUE	0.511	00:23:48
ViT-Small	DINOv3	48	224	20	100	5e-05	FALSE	0.2	0.01	TRUE	0.5105	00:32:48
ConvNeXt-Base	DINOv3	48	224	11	50	5e-05	FALSE	0.2	0.01	TRUE	0.5099	01:03:55
ConvNeXt-Tiny	DINOv3	48	224	18	100	5e-05	FALSE	0.2	0.01	TRUE	0.509	00:34:06
ConvNeXt-Tiny	DINOv3	48	224	30	10	5e-05	TRUE	0.2	0.01	TRUE	0.5082	00:08:40
ConvNeXt-Tiny	DINOv3	48	224	10	100	5e-05	FALSE	0	0.01	TRUE	0.5081	00:36:32
ConvNeXt-Tiny	DINOv3	48	224	30	100	5e-05	FALSE	0	0.01	TRUE	0.508	00:36:35
ViT-Small	DINOv3	48	224	50	100	5e-05	FALSE	0	0.01	TRUE	0.5079	00:31:31
ViT-Small	DINOv3	48	224	30	10	5e-05	TRUE	0.2	0.01	TRUE	0.5068	00:08:35
ViT-Small	DINOv3	48	224	40	10	5e-05	TRUE	0	0.01	TRUE	0.5065	00:07:26
ConvNeXt-Tiny	Sup	48	224	40	100	5e-05	FALSE	0.2	0.01	TRUE	0.5057	00:37:01
ViT-Small	DINOv3	48	224	20	10	5e-05	TRUE	0.2	0.01	TRUE	0.504	00:08:40
ConvNeXt-Tiny	Sup	48	224	10	10	5e-05	TRUE	0	0.01	TRUE	0.5025	00:15:39
ConvNeXt-Tiny	DINOv3	48	224	20	100	5e-05	FALSE	0	0.01	TRUE	0.5024	00:36:33
ConvNeXt-Tiny	Sup	48	224	40	100	5e-05	FALSE	0	0.01	TRUE	0.5021	00:36:07
ConvNeXt-Small	DINOv3	48	224	31	50	5e-05	FALSE	0	0.01	TRUE	0.5013	01:00:38
ViT-Base	DINOv3	48	224	42	100	1e-05	FALSE	0.2	0.01	TRUE	0.5009	00:40:12
ConvNeXt-Tiny	DINOv3	48	224	30	100	5e-05	FALSE	0.2	0.01	TRUE	0.4992	00:37:32
ConvNeXt-Tiny	DINOv3	48	224	20	100	5e-05	FALSE	0.2	0.01	TRUE	0.499	00:37:13
ConvNeXt-Tiny	DINOv3	48	224	10	10	5e-05	TRUE	0	0.01	TRUE	0.4985	00:08:21
ViT-Large	DINOv3	48	224	42	100	1e-05	FALSE	0.2	0.01	TRUE	0.4971	01:00:37
ViT-Small	DINOv3	48	224	30	100	5e-05	FALSE	0	0.01	TRUE	0.4965	00:31:35
ConvNeXt-Small	DINOv3	48	224	51	10	5e-05	TRUE	0.2	0.01	TRUE	0.4965	00:21:20
ConvNeXt-Tiny	DINOv3	48	224	10	100	5e-05	FALSE	0.2	0.01	TRUE	0.4944	00:37:08
ViT-Small	DINOv3	48	224	18	100	5e-05	FALSE	0	0.01	TRUE	0.4938	00:32:26
ConvNeXt-Tiny	DINOv3	48	224	40	100	5e-05	FALSE	0	0.01	TRUE	0.493	00:36:36
ViT-Small	DINOv3	48	224	18	100	5e-05	FALSE	0.2	0.01	TRUE	0.4922	00:30:11
ViT-Small	DINOv3	48	224	42	100	1e-05	TRUE	0.2	0.01	TRUE	0.4907	03:00:38
ViT-Small	DINOv3	48	224	40	100	5e-05	FALSE	0	0.01	TRUE	0.4907	00:31:42
ConvNeXt-Small	DINOv3	48	224	11	10	5e-05	TRUE	0.2	0.01	TRUE	0.4903	00:21:13
ViT-Small	DINOv3	48	224	50	100	5e-05	FALSE	0.2	0.01	TRUE	0.4896	00:32:41
ViT-Small	DINOv3	48	224	40	10	5e-05	TRUE	0.2	0.01	TRUE	0.4881	00:08:30
ConvNeXt-Small	DINOv3	48	224	41	50	5e-05	FALSE	0	0.01	TRUE	0.4871	01:00:41
ConvNeXt-Small	DINOv3	48	224	11	50	5e-05	FALSE	0.2	0.01	TRUE	0.4856	01:01:06
ConvNeXt-Tiny	DINOv3	48	224	50	10	5e-05	TRUE	0	0.01	TRUE	0.4842	00:08:09
ConvNeXt-Small	DINOv3	48	224	51	50	5e-05	FALSE	0.2	0.01	TRUE	0.482	01:00:59
ConvNeXt-Tiny	Sup	48	224	30	10	5e-05	TRUE	0	0.01	TRUE	0.4796	00:08:08
ConvNeXt-Small	DINOv3	48	224	31	10	5e-05	TRUE	0.2	0.01	TRUE	0.4748	00:21:19
ViT-Small	DINOv3	64	224	42	100	1e-05	FALSE	0.2	0.01	TRUE	0.4714	01:55:08
ConvNeXt-Tiny	DINOv3	48	224	30	10	5e-05	TRUE	0	0.01	TRUE	0.4657	00:08:19
ConvNeXt-Tiny	DINOv3	48	224	18	100	5e-05	FALSE	0	0.01	TRUE	0.4656	00:38:59
ViT-Small	Sup	48	224	42	100	5e-05	TRUE	0	0.01	TRUE	0.4492	01:09:38
ViT-Small	Sup	48	224	20	100	5e-05	FALSE	0	0.01	TRUE	0.4212	00:31:21
ViT-Small	Sup	48	224	20	10	5e-05	TRUE	0.2	0.01	TRUE	0.4171	00:09:26
ViT-Small	Sup	48	224	20	10	5e-05	TRUE	0	0.01	TRUE	0.4124	00:07:26
ViT-Small	Sup	48	224	10	100	5e-05	FALSE	0	0.01	TRUE	0.403	00:31:19
ViT-Small	Sup	48	224	42	100	5e-05	TRUE	0.2	0.01	TRUE	0.4006	01:19:18
ViT-Small	Sup	48	224	30	10	5e-05	TRUE	0.2	0.01	TRUE	0.3979	00:08:32
ViT-Small	Sup	48	224	10	100	5e-05	FALSE	0.2	0.01	TRUE	0.3912	00:32:20
ViT-Small	Sup	48	224	30	100	5e-05	FALSE	0.2	0.01	TRUE	0.3902	00:32:08
ViT-Small	Sup	48	224	10	10	5e-05	TRUE	0.2	0.01	TRUE	0.3892	00:13:47
ViT-Small	Sup	48	224	20	100	5e-05	FALSE	0.2	0.01	TRUE	0.3889	00:32:15
ViT-Small	Sup	48	224	30	100	5e-05	FALSE	0	0.01	TRUE	0.3889	00:31:20
ViT-Small	Sup	48	224	42	100	5e-05	FALSE	0.2	0.01	TRUE	0.378	00:29:30
ViT-Small	Sup	48	224	40	100	5e-05	FALSE	0.2	0.01	TRUE	0.3739	00:32:03
ViT-Small	Sup	48	224	42	60	5e-05	FALSE	0	0.01	TRUE	0.3703	01:03:41
ViT-Small	Sup	48	224	50	100	5e-05	FALSE	0	0.01	TRUE	0.3687	00:31:14
ViT-Small	Sup	48	224	42	100	1e-05	FALSE	0.2	0.01	TRUE	0.3685	00:34:11
ViT-Small	Sup	48	224	40	100	5e-05	FALSE	0	0.01	TRUE	0.3665	00:31:30
ViT-Small	Sup	48	224	50	100	5e-05	FALSE	0.2	0.01	TRUE	0.3656	00:32:09
ViT-Small	Sup	48	224	30	10	5e-05	TRUE	0	0.01	TRUE	0.3631	00:07:29
ViT-Small	Sup	48	224	50	10	5e-05	TRUE	0.2	0.01	TRUE	0.3583	00:11:43
ViT-Small	Sup	48	224	42	60	5e-05	FALSE	0	0.01	TRUE	0.3486	01:03:41
ViT-Small	Sup	48	224	40	10	5e-05	TRUE	0.2	0.01	TRUE	0.3451	00:24:12
ViT-Small	Sup	48	224	10	10	5e-05	TRUE	0	0.01	TRUE	0.3443	00:07:28
ViT-Small	Sup	48	224	40	10	5e-05	TRUE	0	0.01	TRUE	0.3235	00:07:34
ViT-Small	Sup	48	224	50	10	5e-05	TRUE	0	0.01	TRUE	0.3073	00:07:29
ConvNeXt-Tiny	DINOv3	48	224	10	100	5e-05	FALSE	0.2	0.01	FALSE	0.5387	00:37:34
ConvNeXt-Tiny	DINOv3	48	224	10	100	5e-05	FALSE	0.2	0	FALSE	0.5099	00:37:21
ConvNeXt-Tiny	DINOv3	48	224	10	100	5e-05	FALSE	0.2	0	TRUE	0.5227	00:37:04
ConvNeXt-Tiny	DINOv3	48	224	10	100	5e-05	FALSE	0	0.01	FALSE	0.5176	00:36:12
ConvNeXt-Tiny	DINOv3	48	224	10	60	5e-05	FALSE	0	0	FALSE	0.4914	00:21:58
ConvNeXt-Tiny	DINOv3	48	224	10	100	5e-05	FALSE	0	0	TRUE	0.5665	00:35:27
ConvNeXt-Tiny	DINOv3	48	224	20	100	5e-05	FALSE	0.2	0.01	FALSE	0.4649	00:37:37
ConvNeXt-Tiny	DINOv3	48	224	20	100	5e-05	FALSE	0.2	0	FALSE	0.4853	00:37:13
ConvNeXt-Tiny	DINOv3	48	224	20	100	5e-05	FALSE	0.2	0	TRUE	0.5064	00:37:15
ConvNeXt-Tiny	DINOv3	48	224	20	100	5e-05	FALSE	0	0.01	FALSE	0.4734	00:35:55
ConvNeXt-Tiny	DINOv3	48	224	20	60	5e-05	FALSE	0	0	FALSE	0.4745	00:21:50
ConvNeXt-Tiny	DINOv3	48	224	20	100	5e-05	FALSE	0	0	TRUE	0.5209	00:35:45
ConvNeXt-Tiny	DINOv3	48	224	30	100	5e-05	FALSE	0.2	0.01	FALSE	0.4687	00:37:43
ConvNeXt-Tiny	DINOv3	48	224	30	100	5e-05	FALSE	0.2	0	FALSE	0.4807	00:37:11
ConvNeXt-Tiny	DINOv3	48	224	30	100	5e-05	FALSE	0.2	0	TRUE	0.5168	00:37:03
ConvNeXt-Tiny	DINOv3	48	224	30	100	5e-05	FALSE	0	0.01	FALSE	0.4911	00:36:09
ConvNeXt-Tiny	DINOv3	48	224	30	60	5e-05	FALSE	0	0	FALSE	0.4886	00:20:25
ConvNeXt-Tiny	DINOv3	48	224	30	100	5e-05	FALSE	0	0	TRUE	0.5379	00:35:39
ConvNeXt-Tiny	DINOv3	48	224	40	100	5e-05	FALSE	0.2	0.01	FALSE	0.481	00:37:50
ConvNeXt-Tiny	DINOv3	48	224	40	100	5e-05	FALSE	0.2	0	FALSE	0.489	00:37:27
ConvNeXt-Tiny	DINOv3	48	224	40	100	5e-05	FALSE	0.2	0	TRUE	0.5302	00:37:03
ConvNeXt-Tiny	DINOv3	48	224	40	100	5e-05	FALSE	0	0.01	FALSE	0.5218	00:36:02
ConvNeXt-Tiny	DINOv3	48	224	40	60	5e-05	FALSE	0	0	FALSE	0.4802	00:21:05
ConvNeXt-Tiny	DINOv3	48	224	40	100	5e-05	FALSE	0	0	TRUE	0.5143	00:35:45
ConvNeXt-Tiny	DINOv3	48	224	42	60	5e-05	FALSE	0.2	0.01	FALSE	0.5054	01:11:22
ConvNeXt-Tiny	DINOv3	48	224	42	60	5e-05	FALSE	0.2	0	FALSE	0.5037	01:11:43
ConvNeXt-Tiny	DINOv3	48	224	42	60	5e-05	FALSE	0.2	0	TRUE	0.5096	01:11:35
ConvNeXt-Tiny	DINOv3	48	224	42	60	5e-05	FALSE	0	0.01	FALSE	0.4998	01:10:57
ConvNeXt-Tiny	DINOv3	48	224	42	60	5e-05	FALSE	0	0	FALSE	0.4998	01:11:16
ConvNeXt-Tiny	DINOv3	48	224	42	60	5e-05	FALSE	0	0	TRUE	0.5424	01:11:17
ConvNeXt-Tiny	DINOv3	48	224	50	100	5e-05	FALSE	0.2	0.01	FALSE	0.5095	00:37:44
ConvNeXt-Tiny	DINOv3	48	224	50	100	5e-05	FALSE	0.2	0	FALSE	0.4849	00:37:18
ConvNeXt-Tiny	DINOv3	48	224	50	100	5e-05	FALSE	0.2	0	TRUE	0.4799	00:37:15
ConvNeXt-Tiny	DINOv3	48	224	50	100	5e-05	FALSE	0	0.01	FALSE	0.5229	00:36:00
ConvNeXt-Tiny	DINOv3	48	224	50	60	5e-05	FALSE	0	0	FALSE	0.4915	00:20:17
ConvNeXt-Tiny	DINOv3	48	224	50	100	5e-05	FALSE	0	0	TRUE	0.5132	00:35:38
ConvNeXt-Tiny	DINOv3	48	224	66	60	5e-05	FALSE	0.2	0.01	FALSE	0.4662	01:11:18
ConvNeXt-Tiny	DINOv3	48	224	66	60	5e-05	FALSE	0.2	0	FALSE	0.4585	01:11:20
ConvNeXt-Tiny	DINOv3	48	224	66	60	5e-05	FALSE	0	0.01	FALSE	0.5254	01:10:54
ConvNeXt-Tiny	DINOv3	48	224	10	10	5e-05	TRUE	0.2	0.01	FALSE	0.4999	00:09:30
ConvNeXt-Tiny	DINOv3	48	224	10	10	5e-05	TRUE	0.2	0	FALSE	0.5009	00:09:12
ConvNeXt-Tiny	DINOv3	48	224	10	10	5e-05	TRUE	0.2	0	TRUE	0.5169	00:08:37
ConvNeXt-Tiny	DINOv3	48	224	10	10	5e-05	TRUE	0	0.01	FALSE	0.4649	00:08:27
ConvNeXt-Tiny	DINOv3	48	224	10	10	5e-05	TRUE	0	0	FALSE	0.4767	00:08:16
ConvNeXt-Tiny	DINOv3	48	224	10	10	5e-05	TRUE	0	0	TRUE	0.5013	00:08:03
ConvNeXt-Tiny	DINOv3	48	224	18	100	5e-05	TRUE	0.2	0.01	FALSE	0.5116	01:27:42
ConvNeXt-Tiny	DINOv3	48	224	18	100	5e-05	TRUE	0.2	0	FALSE	0.4769	01:25:32
ConvNeXt-Tiny	DINOv3	48	224	18	100	5e-05	TRUE	0.2	0	TRUE	0.5029	01:24:08
ConvNeXt-Tiny	DINOv3	48	224	18	60	5e-05	TRUE	0	0	FALSE	0.4881	01:48:48
ConvNeXt-Tiny	DINOv3	48	224	18	60	5e-05	TRUE	0	0	TRUE	0.5089	01:50:03
ConvNeXt-Tiny	DINOv3	48	224	20	10	5e-05	TRUE	0.2	0.01	FALSE	0.4465	00:09:26
ConvNeXt-Tiny	DINOv3	48	224	20	10	5e-05	TRUE	0.2	0	FALSE	0.4941	00:09:05
ConvNeXt-Tiny	DINOv3	48	224	20	10	5e-05	TRUE	0.2	0	TRUE	0.5108	00:08:35
ConvNeXt-Tiny	DINOv3	48	224	20	10	5e-05	TRUE	0	0.01	FALSE	0.4798	00:08:27
ConvNeXt-Tiny	DINOv3	48	224	20	10	5e-05	TRUE	0	0	FALSE	0.4798	00:08:15
ConvNeXt-Tiny	DINOv3	48	224	20	10	5e-05	TRUE	0	0	TRUE	0.4574	00:08:06
ConvNeXt-Tiny	DINOv3	48	224	30	10	5e-05	TRUE	0.2	0.01	FALSE	0.4991	00:09:30
ConvNeXt-Tiny	DINOv3	48	224	30	10	5e-05	TRUE	0.2	0	FALSE	0.5056	00:09:04
ConvNeXt-Tiny	DINOv3	48	224	30	10	5e-05	TRUE	0.2	0	TRUE	0.4865	00:08:36
ConvNeXt-Tiny	DINOv3	48	224	30	10	5e-05	TRUE	0	0.01	FALSE	0.5086	00:08:27
ConvNeXt-Tiny	DINOv3	48	224	30	10	5e-05	TRUE	0	0	FALSE	0.5234	00:08:16
ConvNeXt-Tiny	DINOv3	48	224	30	10	5e-05	TRUE	0	0	TRUE	0.5183	00:08:02
ConvNeXt-Tiny	DINOv3	48	224	40	10	5e-05	TRUE	0.2	0.01	FALSE	0.518	00:09:29
ConvNeXt-Tiny	DINOv3	48	224	40	10	5e-05	TRUE	0.2	0	FALSE	0.4968	00:09:03
ConvNeXt-Tiny	DINOv3	48	224	40	10	5e-05	TRUE	0.2	0	TRUE	0.5154	00:08:50
ConvNeXt-Tiny	DINOv3	48	224	40	10	5e-05	TRUE	0	0.01	FALSE	0.5148	00:08:27
ConvNeXt-Tiny	DINOv3	48	224	40	10	5e-05	TRUE	0	0	FALSE	0.5054	00:08:16
ConvNeXt-Tiny	DINOv3	48	224	40	10	5e-05	TRUE	0	0	TRUE	0.5257	00:08:02
ConvNeXt-Tiny	DINOv3	48	224	42	60	5e-05	TRUE	0.2	0	FALSE	0.4812	01:53:11
ConvNeXt-Tiny	DINOv3	48	224	42	60	5e-05	TRUE	0	0	TRUE	0.5106	01:50:59
ConvNeXt-Tiny	DINOv3	48	224	50	10	5e-05	TRUE	0.2	0.01	FALSE	0.5165	00:09:27
ConvNeXt-Tiny	DINOv3	48	224	50	10	5e-05	TRUE	0.2	0	FALSE	0.5163	00:09:04
ConvNeXt-Tiny	DINOv3	48	224	50	10	5e-05	TRUE	0.2	0	TRUE	0.4952	00:08:54
ConvNeXt-Tiny	DINOv3	48	224	50	10	5e-05	TRUE	0	0.01	FALSE	0.4792	00:08:26
ConvNeXt-Tiny	DINOv3	48	224	50	10	5e-05	TRUE	0	0	FALSE	0.5179	00:08:15
ConvNeXt-Tiny	DINOv3	48	224	50	10	5e-05	TRUE	0	0	TRUE	0.456	00:08:03
ConvNeXt-Tiny	DINOv3	48	224	66	60	5e-05	TRUE	0	0	FALSE	0.4488	01:49:06
ConvNeXt-Tiny	DINOv3	48	224	66	60	5e-05	TRUE	0	0	TRUE	0.5629	01:49:56
ConvNeXt-Tiny	Sup	48	224	10	100	5e-05	FALSE	0.2	0.01	FALSE	0.5018	00:37:47
ConvNeXt-Tiny	Sup	48	224	10	60	5e-05	FALSE	0.2	0	FALSE	0.5045	01:10:29
ConvNeXt-Tiny	Sup	48	224	10	100	5e-05	FALSE	0.2	0	TRUE	0.533	00:36:51
ConvNeXt-Tiny	Sup	48	224	10	60	5e-05	FALSE	0	0.01	FALSE	0.5191	01:09:55
ConvNeXt-Tiny	Sup	48	224	10	60	5e-05	FALSE	0	0	FALSE	0.5212	00:20:44
ConvNeXt-Tiny	Sup	48	224	10	60	5e-05	FALSE	0	0	TRUE	0.5216	01:09:41
ConvNeXt-Tiny	Sup	48	224	20	100	5e-05	FALSE	0.2	0.01	FALSE	0.4721	00:37:47
ConvNeXt-Tiny	Sup	48	224	20	60	5e-05	FALSE	0.2	0	FALSE	0.4531	01:11:27
ConvNeXt-Tiny	Sup	48	224	20	100	5e-05	FALSE	0.2	0	TRUE	0.5366	00:36:43
ConvNeXt-Tiny	Sup	48	224	20	60	5e-05	FALSE	0	0.01	FALSE	0.4567	01:09:57
ConvNeXt-Tiny	Sup	48	224	20	60	5e-05	FALSE	0	0	FALSE	0.4536	00:20:14
ConvNeXt-Tiny	Sup	48	224	20	60	5e-05	FALSE	0	0	TRUE	0.5346	01:09:37
ConvNeXt-Tiny	Sup	48	224	30	100	5e-05	FALSE	0.2	0.01	FALSE	0.5232	00:38:46
ConvNeXt-Tiny	Sup	48	224	30	60	5e-05	FALSE	0.2	0	FALSE	0.522	01:10:12
ConvNeXt-Tiny	Sup	48	224	30	100	5e-05	FALSE	0.2	0	TRUE	0.5116	00:36:39
ConvNeXt-Tiny	Sup	48	224	30	60	5e-05	FALSE	0	0.01	FALSE	0.531	01:09:51
ConvNeXt-Tiny	Sup	48	224	30	60	5e-05	FALSE	0	0	FALSE	0.4933	00:20:17
ConvNeXt-Tiny	Sup	48	224	30	60	5e-05	FALSE	0	0	TRUE	0.5337	01:09:46
ConvNeXt-Tiny	Sup	48	224	40	100	5e-05	FALSE	0.2	0.01	FALSE	0.5017	00:37:29
ConvNeXt-Tiny	Sup	48	224	40	60	5e-05	FALSE	0.2	0	FALSE	0.4942	01:10:18
ConvNeXt-Tiny	Sup	48	224	40	100	5e-05	FALSE	0.2	0	TRUE	0.5259	00:37:35
ConvNeXt-Tiny	Sup	48	224	40	60	5e-05	FALSE	0	0.01	FALSE	0.5018	01:09:55
ConvNeXt-Tiny	Sup	48	224	40	60	5e-05	FALSE	0	0	FALSE	0.4707	00:20:27
ConvNeXt-Tiny	Sup	48	224	40	60	5e-05	FALSE	0	0	TRUE	0.499	01:10:14
ConvNeXt-Tiny	Sup	48	224	42	60	5e-05	FALSE	0.2	0.01	FALSE	0.5203	01:11:22
ConvNeXt-Tiny	Sup	48	224	42	60	5e-05	FALSE	0.2	0	FALSE	0.4755	01:11:12
ConvNeXt-Tiny	Sup	48	224	42	60	5e-05	FALSE	0.2	0	TRUE	0.502	01:11:17
ConvNeXt-Tiny	Sup	48	224	42	60	5e-05	FALSE	0	0.01	FALSE	0.5014	01:10:49
ConvNeXt-Tiny	Sup	48	224	42	60	5e-05	FALSE	0	0	FALSE	0.514	01:10:58
ConvNeXt-Tiny	Sup	48	224	42	60	5e-05	FALSE	0	0	TRUE	0.5091	01:10:55
ConvNeXt-Tiny	Sup	48	224	50	100	5e-05	FALSE	0.2	0.01	FALSE	0.5524	00:37:41
ConvNeXt-Tiny	Sup	48	224	50	60	5e-05	FALSE	0.2	0	FALSE	0.5401	01:10:14
ConvNeXt-Tiny	Sup	48	224	50	100	5e-05	FALSE	0.2	0	TRUE	0.5264	00:36:48
ConvNeXt-Tiny	Sup	48	224	50	60	5e-05	FALSE	0	0.01	FALSE	0.5265	01:10:01
ConvNeXt-Tiny	Sup	48	224	50	60	5e-05	FALSE	0	0	FALSE	0.5319	00:20:36
ConvNeXt-Tiny	Sup	48	224	50	60	5e-05	FALSE	0	0	TRUE	0.5248	01:10:49
ConvNeXt-Tiny	Sup	48	224	10	10	5e-05	TRUE	0.2	0.01	FALSE	0.5094	00:09:13
ConvNeXt-Tiny	Sup	48	224	10	10	5e-05	TRUE	0.2	0	FALSE	0.4834	00:09:05
ConvNeXt-Tiny	Sup	48	224	10	10	5e-05	TRUE	0.2	0	TRUE	0.5282	00:08:41
ConvNeXt-Tiny	Sup	48	224	10	10	5e-05	TRUE	0	0.01	FALSE	0.4933	00:08:24
ConvNeXt-Tiny	Sup	48	224	10	10	5e-05	TRUE	0	0	FALSE	0.5044	00:18:30
ConvNeXt-Tiny	Sup	48	224	10	10	5e-05	TRUE	0	0	TRUE	0.529	00:08:01
ConvNeXt-Tiny	Sup	48	224	18	100	5e-05	TRUE	0.2	0.01	FALSE	0.5007	01:27:33
ConvNeXt-Tiny	Sup	48	224	18	100	5e-05	TRUE	0.2	0	FALSE	0.4895	01:26:55
ConvNeXt-Tiny	Sup	48	224	18	100	5e-05	TRUE	0.2	0	TRUE	0.5176	01:22:11
ConvNeXt-Tiny	Sup	48	224	20	10	5e-05	TRUE	0.2	0.01	FALSE	0.5126	00:09:16
ConvNeXt-Tiny	Sup	48	224	20	10	5e-05	TRUE	0.2	0	FALSE	0.4888	00:09:06
ConvNeXt-Tiny	Sup	48	224	20	10	5e-05	TRUE	0.2	0	TRUE	0.5725	00:09:02
ConvNeXt-Tiny	Sup	48	224	20	10	5e-05	TRUE	0	0.01	FALSE	0.4744	00:08:24
ConvNeXt-Tiny	Sup	48	224	20	10	5e-05	TRUE	0	0	FALSE	0.4546	00:18:20
ConvNeXt-Tiny	Sup	48	224	20	10	5e-05	TRUE	0	0	TRUE	0.5132	00:08:03
ConvNeXt-Tiny	Sup	48	224	30	10	5e-05	TRUE	0.2	0.01	FALSE	0.5009	00:09:13
ConvNeXt-Tiny	Sup	48	224	30	10	5e-05	TRUE	0.2	0	FALSE	0.4962	00:09:07
ConvNeXt-Tiny	Sup	48	224	30	10	5e-05	TRUE	0.2	0	TRUE	0.5506	00:11:51
ConvNeXt-Tiny	Sup	48	224	30	10	5e-05	TRUE	0	0.01	FALSE	0.5012	00:08:24
ConvNeXt-Tiny	Sup	48	224	30	10	5e-05	TRUE	0	0	FALSE	0.5084	00:18:16
ConvNeXt-Tiny	Sup	48	224	30	10	5e-05	TRUE	0	0	TRUE	0.544	00:08:07
ConvNeXt-Tiny	Sup	48	224	32	60	5e-05	TRUE	0	0.01	FALSE	0.4996	01:49:46
ConvNeXt-Tiny	Sup	48	224	40	10	5e-05	TRUE	0.2	0.01	FALSE	0.4902	00:09:15
ConvNeXt-Tiny	Sup	48	224	40	10	5e-05	TRUE	0.2	0	FALSE	0.4931	00:09:05
ConvNeXt-Tiny	Sup	48	224	40	10	5e-05	TRUE	0.2	0	TRUE	0.533	00:09:34
ConvNeXt-Tiny	Sup	48	224	40	10	5e-05	TRUE	0	0.01	FALSE	0.4912	00:08:24
ConvNeXt-Tiny	Sup	48	224	40	10	5e-05	TRUE	0	0	FALSE	0.4913	00:18:15
ConvNeXt-Tiny	Sup	48	224	40	10	5e-05	TRUE	0	0	TRUE	0.5105	00:08:00
ConvNeXt-Tiny	Sup	48	224	42	60	5e-05	TRUE	0	0	FALSE	0.4903	01:49:04
ConvNeXt-Tiny	Sup	48	224	42	60	5e-05	TRUE	0	0	TRUE	0.5363	01:50:15
ConvNeXt-Tiny	Sup	48	224	50	10	5e-05	TRUE	0.2	0.01	FALSE	0.4791	00:10:08
ConvNeXt-Tiny	Sup	48	224	50	10	5e-05	TRUE	0.2	0	FALSE	0.5077	00:09:04
ConvNeXt-Tiny	Sup	48	224	50	10	5e-05	TRUE	0.2	0	TRUE	0.5651	00:08:45
ConvNeXt-Tiny	Sup	48	224	50	10	5e-05	TRUE	0	0.01	FALSE	0.4873	00:08:22
ConvNeXt-Tiny	Sup	48	224	50	10	5e-05	TRUE	0	0	FALSE	0.482	00:18:34
ConvNeXt-Tiny	Sup	48	224	50	10	5e-05	TRUE	0	0	TRUE	0.4651	00:08:03
ConvNeXt-Tiny	Sup	48	224	51	60	5e-05	TRUE	0	0.01	FALSE	0.4695	01:49:19
ConvNeXt-Tiny	Sup	48	224	52	60	5e-05	TRUE	0	0.01	FALSE	0.4837	01:49:15
ConvNeXt-Tiny	Sup	48	224	53	60	5e-05	TRUE	0	0.01	FALSE	0.5384	01:49:17
ConvNeXt-Tiny	Sup	48	224	54	60	5e-05	TRUE	0	0.01	FALSE	0.4849	01:49:09
ConvNeXt-Tiny	Sup	48	224	55	60	5e-05	TRUE	0	0.01	FALSE	0.4836	01:49:20
ConvNeXt-Tiny	Sup	48	224	56	60	5e-05	TRUE	0	0.01	FALSE	0.4971	01:49:10
ConvNeXt-Tiny	Sup	48	224	57	60	5e-05	TRUE	0	0.01	FALSE	0.5035	01:49:21
ConvNeXt-Tiny	Sup	48	224	66	60	5e-05	TRUE	0	0.01	FALSE	0.4606	01:50:08
ConvNeXt-Tiny	Sup	48	224	88	60	5e-05	TRUE	0	0.01	FALSE	0.4865	01:49:11
ViT-Small	DINOv3	48	224	10	100	5e-05	FALSE	0.2	0.01	FALSE	0.4732	00:33:11
ViT-Small	DINOv3	48	224	10	100	5e-05	FALSE	0.2	0	FALSE	0.4494	00:32:32
ViT-Small	DINOv3	48	224	10	100	5e-05	FALSE	0.2	0	TRUE	0.5281	00:33:18
ViT-Small	DINOv3	48	224	10	100	5e-05	FALSE	0	0.01	FALSE	0.4311	00:31:38
ViT-Small	DINOv3	48	224	10	60	5e-05	FALSE	0	0	FALSE	0.4596	00:18:12
ViT-Small	DINOv3	48	224	10	100	5e-05	FALSE	0	0	TRUE	0.5166	00:31:33
ViT-Small	DINOv3	48	224	20	100	5e-05	FALSE	0.2	0.01	FALSE	0.4631	00:33:01
ViT-Small	DINOv3	48	224	20	100	5e-05	FALSE	0.2	0	FALSE	0.4702	00:32:23
ViT-Small	DINOv3	48	224	20	100	5e-05	FALSE	0.2	0	TRUE	0.5116	00:32:57
ViT-Small	DINOv3	48	224	20	100	5e-05	FALSE	0	0.01	FALSE	0.4452	00:31:47
ViT-Small	DINOv3	48	224	20	60	5e-05	FALSE	0	0	FALSE	0.4413	00:19:01
ViT-Small	DINOv3	48	224	20	100	5e-05	FALSE	0	0	TRUE	0.5327	00:31:23
ViT-Small	DINOv3	48	224	30	100	5e-05	FALSE	0.2	0.01	FALSE	0.4211	00:32:53
ViT-Small	DINOv3	48	224	30	100	5e-05	FALSE	0.2	0	FALSE	0.4557	00:32:25
ViT-Small	DINOv3	48	224	30	100	5e-05	FALSE	0.2	0	TRUE	0.5035	00:32:49
ViT-Small	DINOv3	48	224	30	100	5e-05	FALSE	0	0.01	FALSE	0.4605	00:31:50
ViT-Small	DINOv3	48	224	30	60	5e-05	FALSE	0	0	FALSE	0.4456	00:18:49
ViT-Small	DINOv3	48	224	30	100	5e-05	FALSE	0	0	TRUE	0.5163	00:31:27
ViT-Small	DINOv3	48	224	40	100	5e-05	FALSE	0.2	0.01	FALSE	0.4573	00:32:59
ViT-Small	DINOv3	48	224	40	100	5e-05	FALSE	0.2	0	FALSE	0.4605	00:32:25
ViT-Small	DINOv3	48	224	40	100	5e-05	FALSE	0.2	0	TRUE	0.5035	00:32:56
ViT-Small	DINOv3	48	224	40	100	5e-05	FALSE	0	0.01	FALSE	0.3992	00:31:44
ViT-Small	DINOv3	48	224	40	60	5e-05	FALSE	0	0	FALSE	0.4427	00:18:48
ViT-Small	DINOv3	48	224	40	100	5e-05	FALSE	0	0	TRUE	0.5223	00:31:27
ViT-Small	DINOv3	48	224	42	60	5e-05	FALSE	0.2	0.01	FALSE	0.4226	01:09:24
ViT-Small	DINOv3	48	224	42	60	5e-05	FALSE	0.2	0	FALSE	0.4098	01:09:49
ViT-Small	DINOv3	48	224	42	60	5e-05	FALSE	0.2	0	TRUE	0.5218	01:09:29
ViT-Small	DINOv3	48	224	42	60	5e-05	FALSE	0	0.01	FALSE	0.4046	01:09:08
ViT-Small	DINOv3	48	224	42	60	5e-05	FALSE	0	0	FALSE	0.4089	01:09:29
ViT-Small	DINOv3	48	224	42	60	5e-05	FALSE	0	0	TRUE	0.4893	01:09:08
ViT-Small	DINOv3	48	224	50	100	5e-05	FALSE	0.2	0.01	FALSE	0.413	00:33:51
ViT-Small	DINOv3	48	224	50	100	5e-05	FALSE	0.2	0	FALSE	0.4294	00:32:25
ViT-Small	DINOv3	48	224	50	100	5e-05	FALSE	0.2	0	TRUE	0.5125	00:32:40
ViT-Small	DINOv3	48	224	50	100	5e-05	FALSE	0	0.01	FALSE	0.4107	00:31:43
ViT-Small	DINOv3	48	224	50	60	5e-05	FALSE	0	0	FALSE	0.432	00:18:45
ViT-Small	DINOv3	48	224	50	100	5e-05	FALSE	0	0	TRUE	0.5094	00:31:27
ViT-Small	DINOv3	48	224	10	10	5e-05	TRUE	0.2	0.01	FALSE	0.4338	00:08:45
ViT-Small	DINOv3	48	224	10	10	5e-05	TRUE	0.2	0	FALSE	0.4461	00:08:37
ViT-Small	DINOv3	48	224	10	10	5e-05	TRUE	0.2	0	TRUE	0.5433	00:08:23
ViT-Small	DINOv3	48	224	10	10	5e-05	TRUE	0	0.01	FALSE	0.4288	00:07:58
ViT-Small	DINOv3	48	224	10	10	5e-05	TRUE	0	0	FALSE	0.4455	00:07:57
ViT-Small	DINOv3	48	224	10	10	5e-05	TRUE	0	0	TRUE	0.5235	00:07:25
ViT-Small	DINOv3	48	224	18	100	5e-05	TRUE	0.2	0.01	FALSE	0.4462	01:25:52
ViT-Small	DINOv3	48	224	18	100	5e-05	TRUE	0.2	0	FALSE	0.4466	01:22:24
ViT-Small	DINOv3	48	224	18	100	5e-05	TRUE	0.2	0	TRUE	0.5325	01:21:57
ViT-Small	DINOv3	48	224	18	60	5e-05	TRUE	0	0	FALSE	0.4327	01:47:02
ViT-Small	DINOv3	48	224	18	60	5e-05	TRUE	0	0	TRUE	0.5098	01:45:48
ViT-Small	DINOv3	48	224	20	10	5e-05	TRUE	0.2	0.01	FALSE	0.439	00:08:46
ViT-Small	DINOv3	48	224	20	10	5e-05	TRUE	0.2	0	FALSE	0.4547	00:08:39
ViT-Small	DINOv3	48	224	20	10	5e-05	TRUE	0.2	0	TRUE	0.5053	00:08:20
ViT-Small	DINOv3	48	224	20	10	5e-05	TRUE	0	0.01	FALSE	0.4387	00:08:00
ViT-Small	DINOv3	48	224	20	10	5e-05	TRUE	0	0	FALSE	0.4192	00:07:57
ViT-Small	DINOv3	48	224	20	10	5e-05	TRUE	0	0	TRUE	0.5106	00:07:25
ViT-Small	DINOv3	48	224	30	10	5e-05	TRUE	0.2	0.01	FALSE	0.4433	00:08:49
ViT-Small	DINOv3	48	224	30	10	5e-05	TRUE	0.2	0	FALSE	0.424	00:08:37
ViT-Small	DINOv3	48	224	30	10	5e-05	TRUE	0.2	0	TRUE	0.4722	00:08:22
ViT-Small	DINOv3	48	224	30	10	5e-05	TRUE	0	0.01	FALSE	0.4494	00:07:57
ViT-Small	DINOv3	48	224	30	10	5e-05	TRUE	0	0	FALSE	0.4607	00:07:56
ViT-Small	DINOv3	48	224	30	10	5e-05	TRUE	0	0	TRUE	0.5438	00:07:25
ViT-Small	DINOv3	48	224	40	10	5e-05	TRUE	0.2	0.01	FALSE	0.4466	00:08:45
ViT-Small	DINOv3	48	224	40	10	5e-05	TRUE	0.2	0	FALSE	0.4662	00:08:38
ViT-Small	DINOv3	48	224	40	10	5e-05	TRUE	0.2	0	TRUE	0.5033	00:08:23
ViT-Small	DINOv3	48	224	40	10	5e-05	TRUE	0	0.01	FALSE	0.4438	00:07:59
ViT-Small	DINOv3	48	224	40	10	5e-05	TRUE	0	0	FALSE	0.4519	00:07:53
ViT-Small	DINOv3	48	224	40	10	5e-05	TRUE	0	0	TRUE	0.493	00:07:24
ViT-Small	DINOv3	48	224	42	60	5e-05	TRUE	0	0	TRUE	0.5041	01:47:00
ViT-Small	DINOv3	48	224	50	10	5e-05	TRUE	0.2	0.01	FALSE	0.4505	00:08:46
ViT-Small	DINOv3	48	224	50	10	5e-05	TRUE	0.2	0	FALSE	0.4383	00:08:40
ViT-Small	DINOv3	48	224	50	10	5e-05	TRUE	0.2	0	TRUE	0.4891	00:08:21
ViT-Small	DINOv3	48	224	50	10	5e-05	TRUE	0	0.01	FALSE	0.452	00:07:58
ViT-Small	DINOv3	48	224	50	10	5e-05	TRUE	0	0	FALSE	0.4388	00:07:50
ViT-Small	DINOv3	48	224	50	10	5e-05	TRUE	0	0	TRUE	0.4941	00:07:25
ViT-Small	DINOv3	48	224	66	60	5e-05	TRUE	0	0.01	FALSE	0.4792	01:46:03
ViT-Small	DINOv3	48	224	66	60	5e-05	TRUE	0	0	TRUE	0.5286	01:45:30
ViT-Small	Sup	48	224	10	100	5e-05	FALSE	0.2	0.01	FALSE	0.4019	00:33:03
ViT-Small	Sup	48	224	10	60	5e-05	FALSE	0.2	0	FALSE	0.3891	01:04:57
ViT-Small	Sup	48	224	10	100	5e-05	FALSE	0.2	0	TRUE	0.377	00:32:02
ViT-Small	Sup	48	224	10	60	5e-05	FALSE	0	0.01	FALSE	0.3869	01:04:36
ViT-Small	Sup	48	224	10	60	5e-05	FALSE	0	0	FALSE	0.402	00:18:08
ViT-Small	Sup	48	224	10	60	5e-05	FALSE	0	0	TRUE	0.4177	01:04:31
ViT-Small	Sup	48	224	20	100	5e-05	FALSE	0.2	0.01	FALSE	0.382	00:33:00
ViT-Small	Sup	48	224	20	60	5e-05	FALSE	0.2	0	FALSE	0.3779	01:04:58
ViT-Small	Sup	48	224	20	100	5e-05	FALSE	0.2	0	TRUE	0.3764	00:32:03
ViT-Small	Sup	48	224	20	60	5e-05	FALSE	0	0.01	FALSE	0.3723	01:04:34
ViT-Small	Sup	48	224	20	60	5e-05	FALSE	0	0	FALSE	0.3771	00:18:07
ViT-Small	Sup	48	224	20	60	5e-05	FALSE	0	0	TRUE	0.4081	01:04:32
ViT-Small	Sup	48	224	30	100	5e-05	FALSE	0.2	0.01	FALSE	0.3637	00:33:17
ViT-Small	Sup	48	224	30	60	5e-05	FALSE	0.2	0	FALSE	0.3826	01:05:00
ViT-Small	Sup	48	224	30	100	5e-05	FALSE	0.2	0	TRUE	0.3971	00:32:08
ViT-Small	Sup	48	224	30	60	5e-05	FALSE	0	0.01	FALSE	0.377	01:04:33
ViT-Small	Sup	48	224	30	60	5e-05	FALSE	0	0	FALSE	0.3658	00:18:10
ViT-Small	Sup	48	224	30	60	5e-05	FALSE	0	0	TRUE	0.3363	01:04:48
ViT-Small	Sup	48	224	40	100	5e-05	FALSE	0.2	0.01	FALSE	0.3776	00:32:33
ViT-Small	Sup	48	224	40	60	5e-05	FALSE	0.2	0	FALSE	0.393	01:04:57
ViT-Small	Sup	48	224	40	100	5e-05	FALSE	0.2	0	TRUE	0.3501	00:32:07
ViT-Small	Sup	48	224	40	60	5e-05	FALSE	0	0.01	FALSE	0.3989	01:04:46
ViT-Small	Sup	48	224	40	60	5e-05	FALSE	0	0	FALSE	0.3535	00:18:12
ViT-Small	Sup	48	224	40	60	5e-05	FALSE	0	0	TRUE	0.3653	01:04:35
ViT-Small	Sup	48	224	42	60	5e-05	FALSE	0.2	0.01	FALSE	0.3379	01:04:17
ViT-Small	Sup	48	224	42	60	5e-05	FALSE	0.2	0	FALSE	0.3705	01:03:43
ViT-Small	Sup	48	224	42	60	5e-05	FALSE	0.2	0	TRUE	0.3846	01:03:53
ViT-Small	Sup	48	224	42	60	5e-05	FALSE	0	0.01	FALSE	0.3303	01:03:59
ViT-Small	Sup	48	224	42	60	5e-05	FALSE	0	0	FALSE	0.3396	01:04:29
ViT-Small	Sup	48	224	42	60	5e-05	FALSE	0	0	TRUE	0.3778	01:02:27
ViT-Small	Sup	48	224	50	100	5e-05	FALSE	0.2	0.01	FALSE	0.3779	00:32:22
ViT-Small	Sup	48	224	50	60	5e-05	FALSE	0.2	0	FALSE	0.3853	01:04:57
ViT-Small	Sup	48	224	50	100	5e-05	FALSE	0.2	0	TRUE	0.3784	00:32:04
ViT-Small	Sup	48	224	50	60	5e-05	FALSE	0	0.01	FALSE	0.3898	01:04:41
ViT-Small	Sup	48	224	50	60	5e-05	FALSE	0	0	FALSE	0.3656	00:18:13
ViT-Small	Sup	48	224	50	60	5e-05	FALSE	0	0	TRUE	0.3461	01:04:20
ViT-Small	Sup	48	224	66	60	5e-05	FALSE	0	0.01	FALSE	0.3668	01:04:20
ViT-Small	Sup	48	224	10	10	5e-05	TRUE	0.2	0.01	FALSE	0.3873	00:08:46
ViT-Small	Sup	48	224	10	10	5e-05	TRUE	0.2	0	FALSE	0.3927	00:08:47
ViT-Small	Sup	48	224	10	10	5e-05	TRUE	0.2	0	TRUE	0.3843	00:08:22
ViT-Small	Sup	48	224	10	10	5e-05	TRUE	0	0.01	FALSE	0.3863	00:08:00
ViT-Small	Sup	48	224	10	10	5e-05	TRUE	0	0	FALSE	0.3944	00:17:31
ViT-Small	Sup	48	224	10	10	5e-05	TRUE	0	0	TRUE	0.4181	00:07:25
ViT-Small	Sup	48	224	18	60	5e-05	TRUE	0	0	FALSE	0.4031	01:42:16
ViT-Small	Sup	48	224	18	60	5e-05	TRUE	0	0	TRUE	0.4392	01:38:06
ViT-Small	Sup	48	224	20	10	5e-05	TRUE	0.2	0.01	FALSE	0.3576	00:08:45
ViT-Small	Sup	48	224	20	10	5e-05	TRUE	0.2	0	FALSE	0.3867	00:08:46
ViT-Small	Sup	48	224	20	10	5e-05	TRUE	0.2	0	TRUE	0.3829	00:08:18
ViT-Small	Sup	48	224	20	10	5e-05	TRUE	0	0.01	FALSE	0.354	00:07:57
ViT-Small	Sup	48	224	20	10	5e-05	TRUE	0	0	FALSE	0.3681	00:17:25
ViT-Small	Sup	48	224	20	10	5e-05	TRUE	0	0	TRUE	0.4117	00:07:23
ViT-Small	Sup	48	224	30	10	5e-05	TRUE	0.2	0.01	FALSE	0.37	00:08:47
ViT-Small	Sup	48	224	30	10	5e-05	TRUE	0.2	0	FALSE	0.3943	00:08:51
ViT-Small	Sup	48	224	30	10	5e-05	TRUE	0.2	0	TRUE	0.3872	00:08:23
ViT-Small	Sup	48	224	30	10	5e-05	TRUE	0	0.01	FALSE	0.3845	00:07:59
ViT-Small	Sup	48	224	30	10	5e-05	TRUE	0	0	FALSE	0.373	00:17:37
ViT-Small	Sup	48	224	30	10	5e-05	TRUE	0	0	TRUE	0.3332	00:07:26
ViT-Small	Sup	48	224	40	10	5e-05	TRUE	0.2	0.01	FALSE	0.391	00:08:46
ViT-Small	Sup	48	224	40	10	5e-05	TRUE	0.2	0	FALSE	0.3952	00:08:49
ViT-Small	Sup	48	224	40	10	5e-05	TRUE	0.2	0	TRUE	0.3542	00:08:19
ViT-Small	Sup	48	224	40	10	5e-05	TRUE	0	0.01	FALSE	0.3872	00:07:58
ViT-Small	Sup	48	224	40	10	5e-05	TRUE	0	0	FALSE	0.3667	00:17:30
ViT-Small	Sup	48	224	40	10	5e-05	TRUE	0	0	TRUE	0.4002	00:07:24
ViT-Small	Sup	48	224	42	100	5e-05	TRUE	0.2	0.01	FALSE	0.3913	01:22:42
ViT-Small	Sup	48	224	42	100	5e-05	TRUE	0.2	0	FALSE	0.3976	01:21:40
ViT-Small	Sup	48	224	42	100	5e-05	TRUE	0.2	0	TRUE	0.3969	01:18:57
ViT-Small	Sup	48	224	42	60	5e-05	TRUE	0	0	TRUE	0.3983	01:39:28
ViT-Small	Sup	48	224	50	10	5e-05	TRUE	0.2	0.01	FALSE	0.3509	00:08:45
ViT-Small	Sup	48	224	50	10	5e-05	TRUE	0.2	0	FALSE	0.3366	00:08:48
ViT-Small	Sup	48	224	50	10	5e-05	TRUE	0.2	0	TRUE	0.3257	00:08:25
ViT-Small	Sup	48	224	50	10	5e-05	TRUE	0	0.01	FALSE	0.3263	00:08:00
ViT-Small	Sup	48	224	50	10	5e-05	TRUE	0	0	FALSE	0.3447	00:17:04
ViT-Small	Sup	48	224	50	10	5e-05	TRUE	0	0	TRUE	0.3241	00:07:20
ViT-Small	Sup	48	224	66	60	5e-05	TRUE	0	0.01	FALSE	0.4204	01:40:07
ViT-Small	Sup	48	224	66	60	5e-05	TRUE	0	0	FALSE	0.4127	01:39:49
ViT-Small	Sup	48	224	66	60	5e-05	TRUE	0	0	TRUE	0.4013	01:38:43
