# Supplementary material
Source: Research Square preprint supplement (doi:10.21203/rs.3.rs-9405252/v1)
Supplement: Supplementary file 5 [file f0868d74851cbd429fec8977.xlsx]

## Sheet: Sheet1
Backbone	Pretraining	Batch Size	Resolution	Seed	Epochs	LR	Linear Interpolation Brightness	Random Brightness	Gaussian Noise	Random Crop&Resize	mIoU	Training Time	Remarks
ConvNeXt-Tiny	DINOv3	48	224	18	100	5e-05	Interval15	0.2	0.01	TRUE	0.5698	01:21:15	A
ConvNeXt-Tiny	DINOv3	48	224	10	10	5e-05	Interval15	0.2	0.01	TRUE	0.5397	00:08:39
ConvNeXt-Tiny	DINOv3	48	224	40	10	5e-05	Interval15	0.2	0.01	TRUE	0.5285	00:08:37
ConvNeXt-Tiny	DINOv3	48	224	42	40	5e-05	Interval15	0.2	0.01	TRUE	0.5226	01:14:36
ConvNeXt-Tiny	DINOv3	48	224	50	10	5e-05	Interval15	0.2	0.01	TRUE	0.5196	00:08:39
ConvNeXt-Tiny	DINOv3	48	224	20	10	5e-05	Interval15	0.2	0.01	TRUE	0.5187	00:08:39
ConvNeXt-Tiny	DINOv3	48	224	30	10	5e-05	Interval15	0.2	0.01	TRUE	0.5082	00:08:40
ConvNeXt-Tiny	DINOv3	48	224	10	60	5e-05	Interval30	0.2	0.01	TRUE	0.554	00:50:10	B
ConvNeXt-Tiny	DINOv3	48	224	20	60	5e-05	Interval30	0.2	0.01	TRUE	0.5347	00:49:56
ConvNeXt-Tiny	DINOv3	48	224	30	60	5e-05	Interval30	0.2	0.01	TRUE	0.5237	00:49:59
ConvNeXt-Tiny	DINOv3	48	224	40	60	5e-05	Interval30	0.2	0.01	TRUE	0.5261	00:50:08
ConvNeXt-Tiny	DINOv3	48	224	50	60	5e-05	Interval30	0.2	0.01	TRUE	0.5194	00:50:30
ConvNeXt-Tiny	DINOv3	48	224	60	60	5e-05	Interval30	0.2	0.01	TRUE	0.5259	00:50:24
ConvNeXt-Tiny	DINOv3	48	224	70	60	5e-05	Interval30	0.2	0.01	TRUE	0.5216	00:49:55
ConvNeXt-Tiny	DINOv3	48	224	10	60	5e-05	Interval45	0.2	0.01	TRUE	0.5283	00:50:12	C
ConvNeXt-Tiny	DINOv3	48	224	20	60	5e-05	Interval45	0.2	0.01	TRUE	0.5458	00:50:15
ConvNeXt-Tiny	DINOv3	48	224	30	60	5e-05	Interval45	0.2	0.01	TRUE	0.5134	00:49:34
ConvNeXt-Tiny	DINOv3	48	224	40	60	5e-05	Interval45	0.2	0.01	TRUE	0.5496	00:50:04
ConvNeXt-Tiny	DINOv3	48	224	50	60	5e-05	Interval45	0.2	0.01	TRUE	0.5253	00:49:48
ConvNeXt-Tiny	DINOv3	48	224	60	60	5e-05	Interval45	0.2	0.01	TRUE	0.5236	00:49:56
ConvNeXt-Tiny	DINOv3	48	224	70	60	5e-05	Interval45	0.2	0.01	TRUE	0.5291	00:50:50
