# Supplementary material
Source: Research Square preprint supplement (doi:10.21203/rs.3.rs-9405252/v1)
Supplement: Supplementary file 6 [file f61c8db3ce5a7c1ef1229819.xlsx]

## Sheet: Sheet1
Backbone	Pretraining	Batch Size	Resolution	Seed	Epochs	LR	Linear Interpolation Brightness	Random Brightness	Gaussian Noise	Random Crop&Resize	mIoU	Training Time	Remarks
ConvNeXt-Tiny	DINOv3	48	224	10	60	5e-05	FALSE	0.2	0.01	TRUE	0.4877	01:02:58	A
ConvNeXt-Tiny	DINOv3	48	224	20	60	5e-05	FALSE	0.2	0.01	TRUE	0.4987	00:47:19
ConvNeXt-Tiny	DINOv3	48	224	30	60	5e-05	FALSE	0.2	0.01	TRUE	0.4805	00:47:01
ConvNeXt-Tiny	DINOv3	48	224	40	60	5e-05	FALSE	0.2	0.01	TRUE	0.4969	00:46:48
ConvNeXt-Tiny	DINOv3	48	224	50	60	5e-05	FALSE	0.2	0.01	TRUE	0.4986	00:46:41
ConvNeXt-Tiny	DINOv3	48	224	18	100	5e-05	TRUE	0.2	0.01	TRUE	0.5698	01:21:15	B
ConvNeXt-Tiny	DINOv3	48	224	10	10	5e-05	TRUE	0.2	0.01	TRUE	0.5397	00:08:39
ConvNeXt-Tiny	DINOv3	48	224	40	10	5e-05	TRUE	0.2	0.01	TRUE	0.5285	00:08:37
ConvNeXt-Tiny	DINOv3	48	224	42	40	5e-05	TRUE	0.2	0.01	TRUE	0.5226	01:14:36
ConvNeXt-Tiny	DINOv3	48	224	50	10	5e-05	TRUE	0.2	0.01	TRUE	0.5196	00:08:39
ConvNeXt-Tiny	DINOv3	48	224	20	10	5e-05	TRUE	0.2	0.01	TRUE	0.5187	00:08:39
ConvNeXt-Tiny	DINOv3	48	224	30	10	5e-05	TRUE	0.2	0.01	TRUE	0.5082	00:08:40
ConvNeXt-Tiny	DINOv3	48	224	10	60	5e-05	FALSE	0	0	FALSE	0.4914	00:21:58	C
ConvNeXt-Tiny	DINOv3	48	224	20	60	5e-05	FALSE	0	0	FALSE	0.4745	00:21:50
ConvNeXt-Tiny	DINOv3	48	224	30	60	5e-05	FALSE	0	0	FALSE	0.4886	00:20:25
ConvNeXt-Tiny	DINOv3	48	224	40	60	5e-05	FALSE	0	0	FALSE	0.4802	00:21:05
ConvNeXt-Tiny	DINOv3	48	224	42	60	5e-05	FALSE	0	0	FALSE	0.4998	01:11:16
ConvNeXt-Tiny	DINOv3	48	224	50	60	5e-05	FALSE	0	0	FALSE	0.4915	00:20:17
